# Supplementary material
Source: PubMed Central journal article supplement (PMC2330312)

# UV-B Stress (Root)

## Trp metabolism

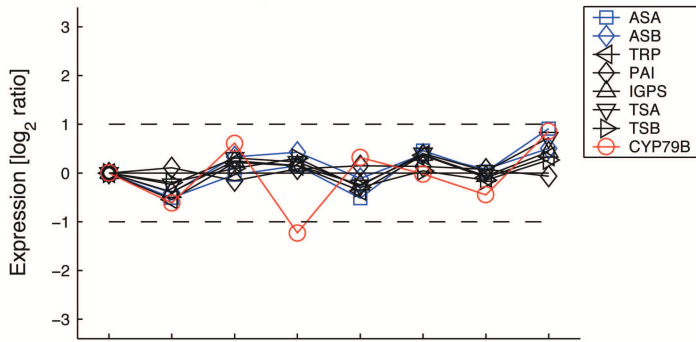

## Phe & Tyr metabolism

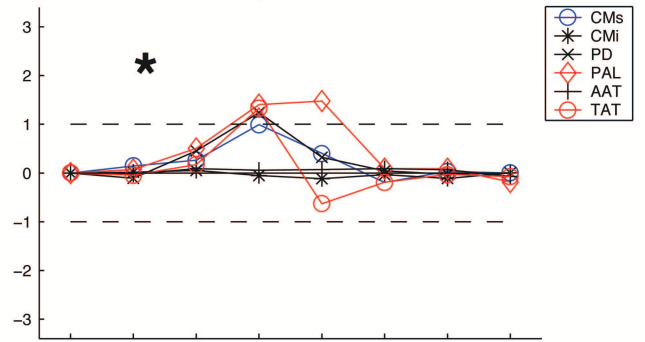

## Pro & Arg metabolism

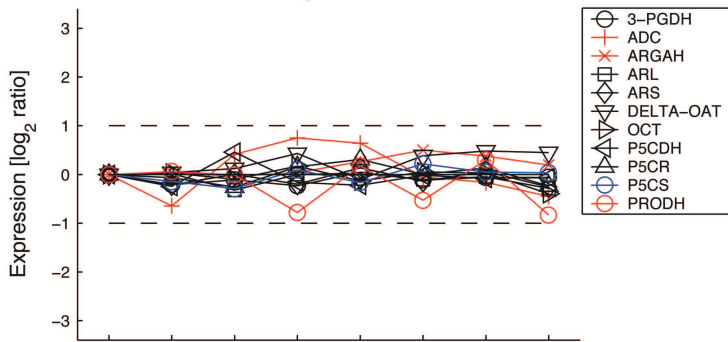

## Lys metabolism

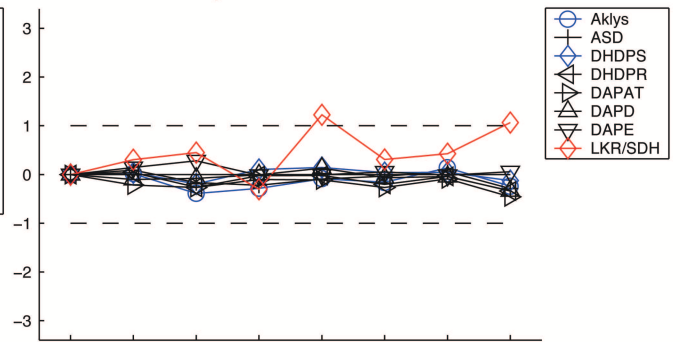

## Met metabolism

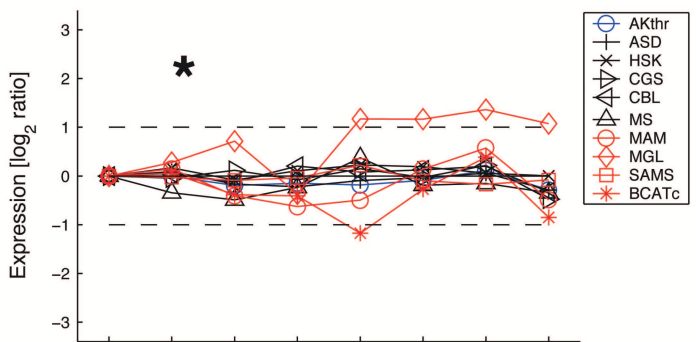

## Thr metabolism

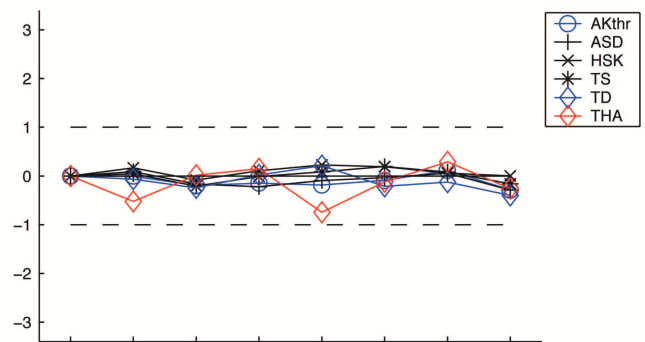

## Ile, Val & Leu metabolism

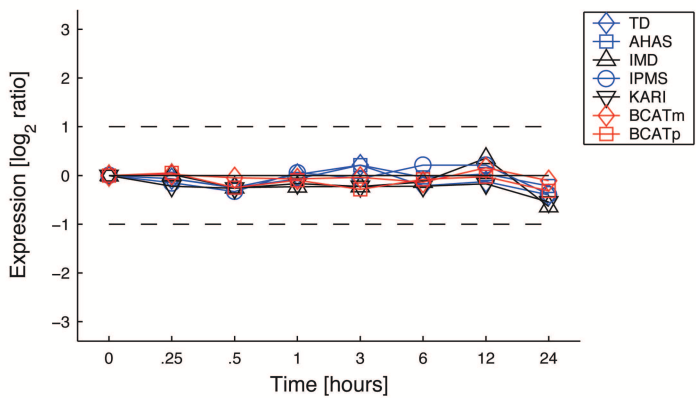

# Salt Stress (Root)

## Trp metabolism

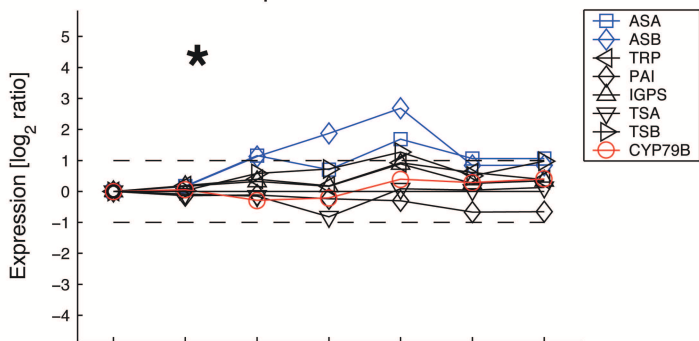

## Phe & Tyr metabolism

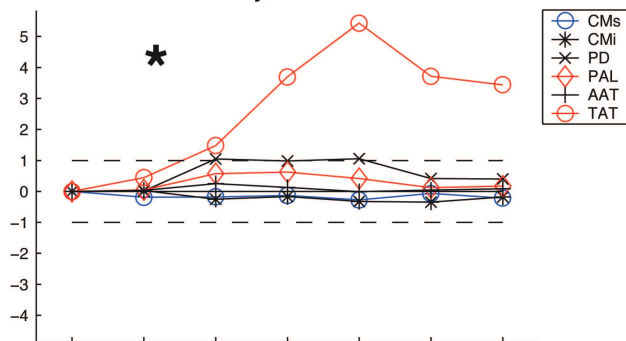

## Pro & Arg metabolism

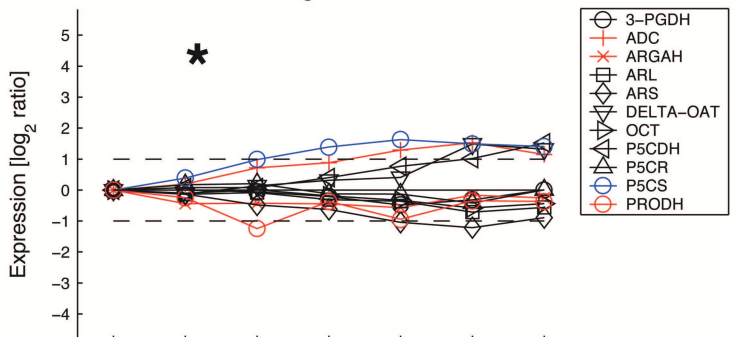

## Lys metabolism

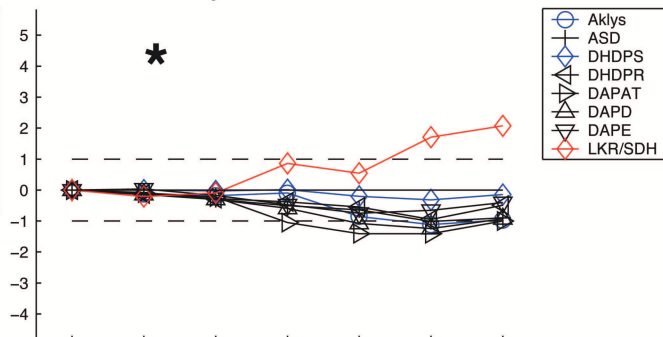

## Met metabolism

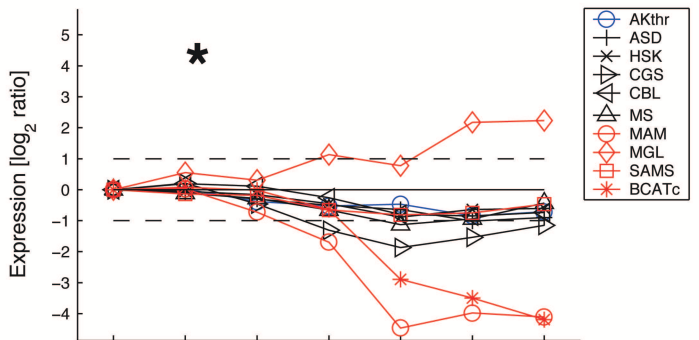

## Thr metabolism

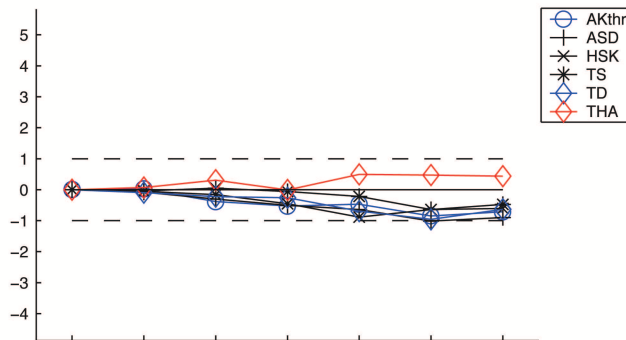

## Ile, Val & Leu metabolism

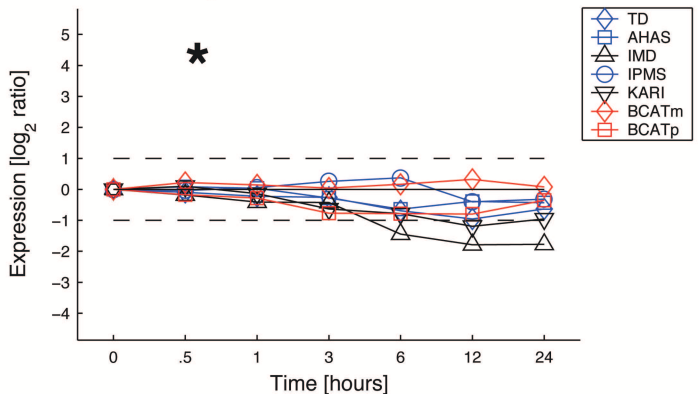

# Oxidative Stress (Root)

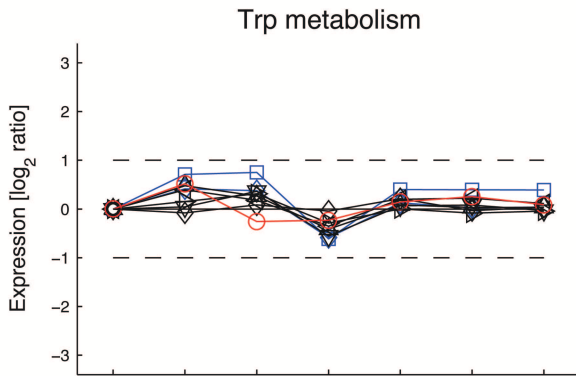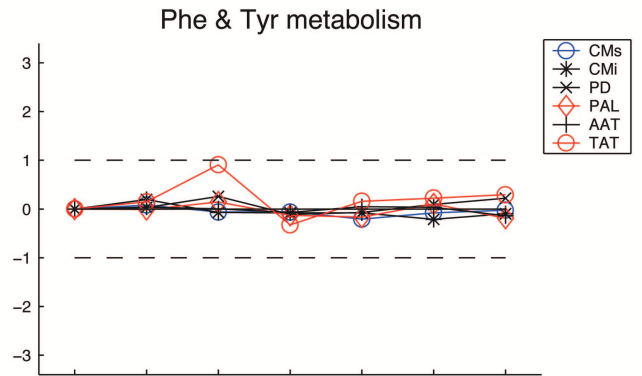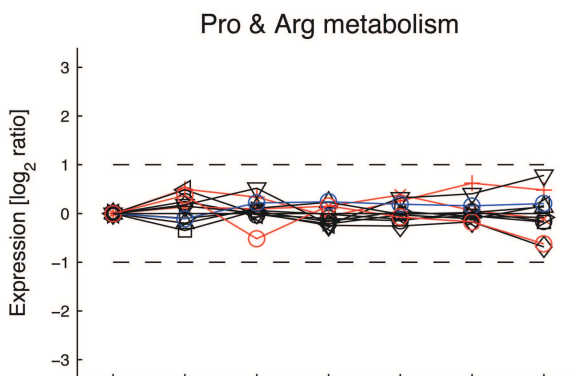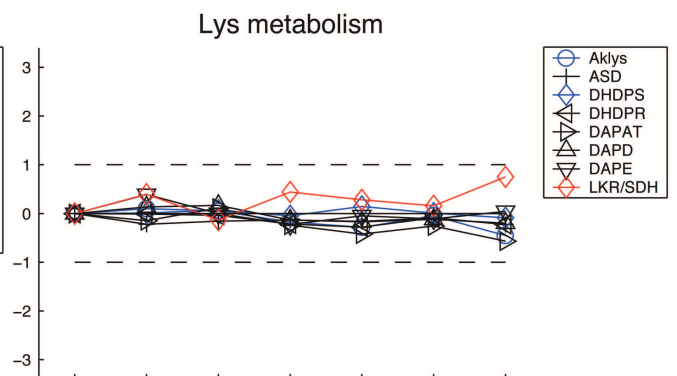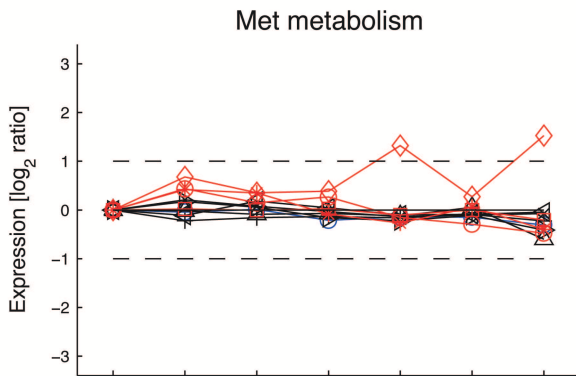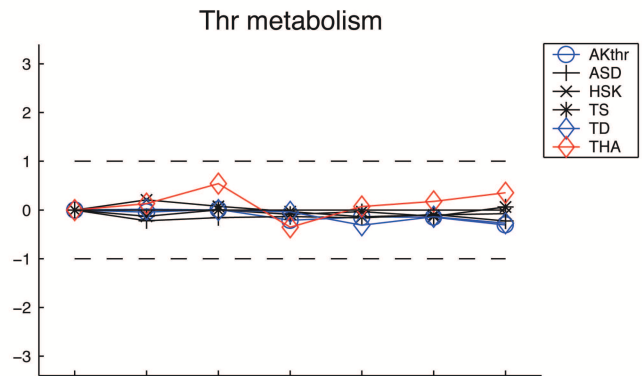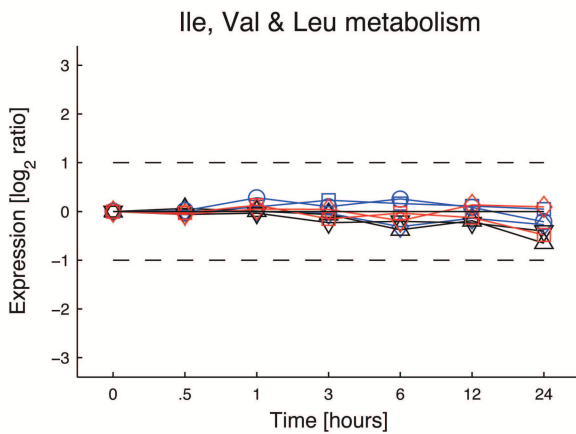

Time [hours]

# Osmotic Stress (Root)

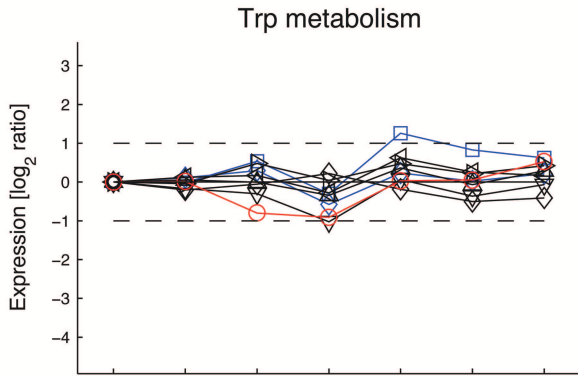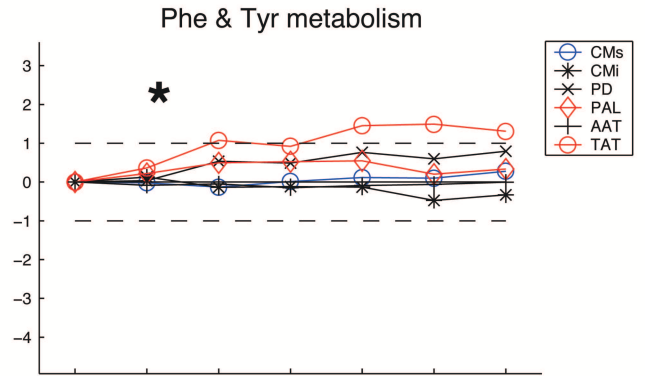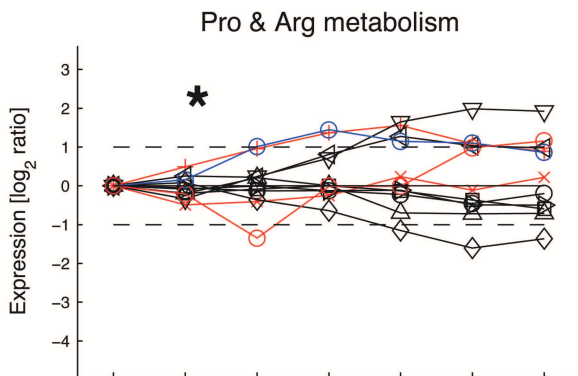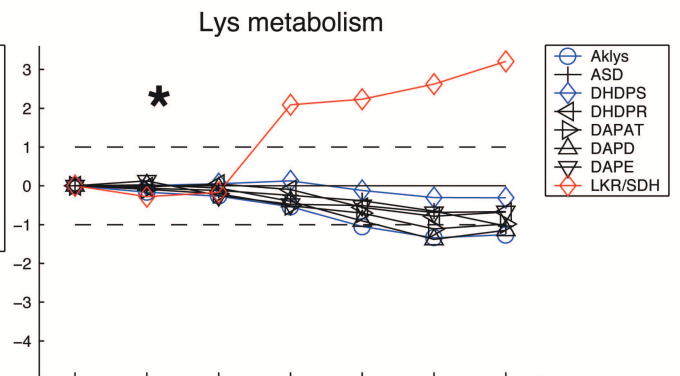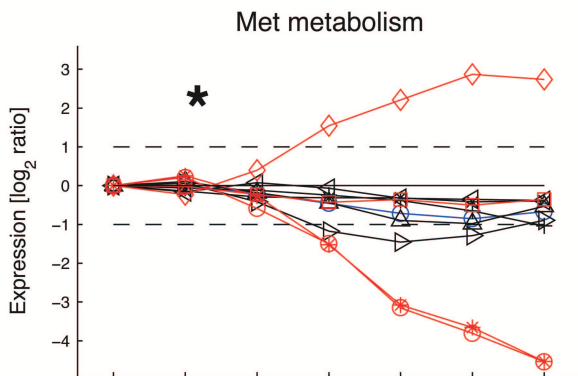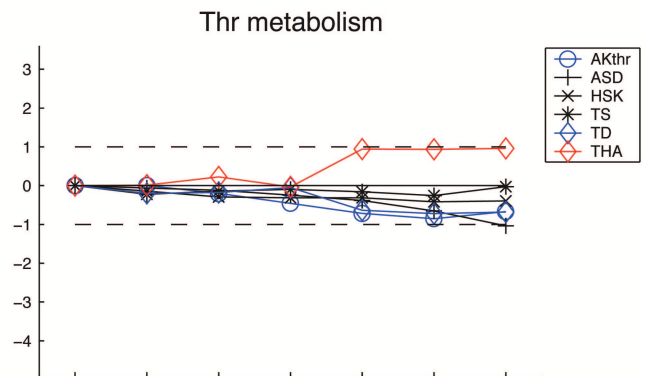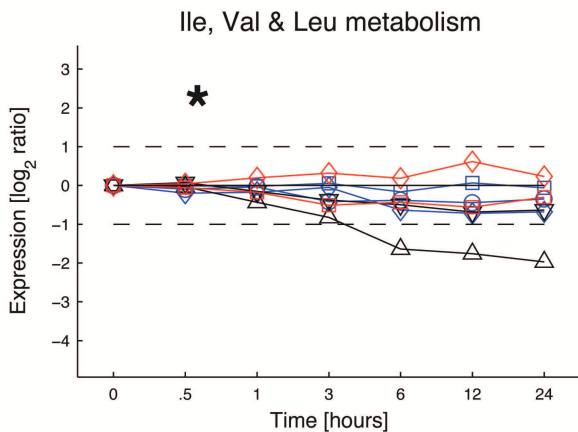

# Heat Stress (Root)

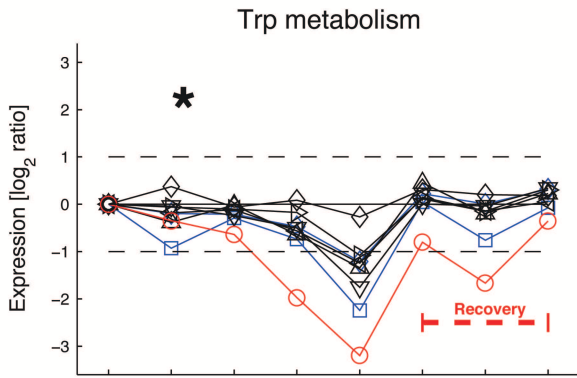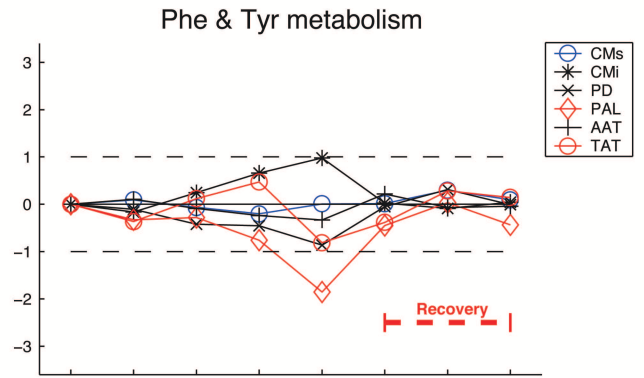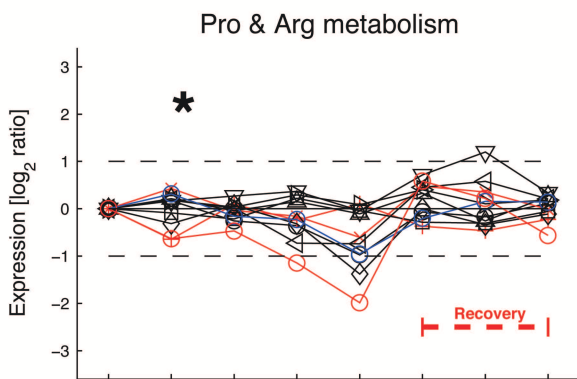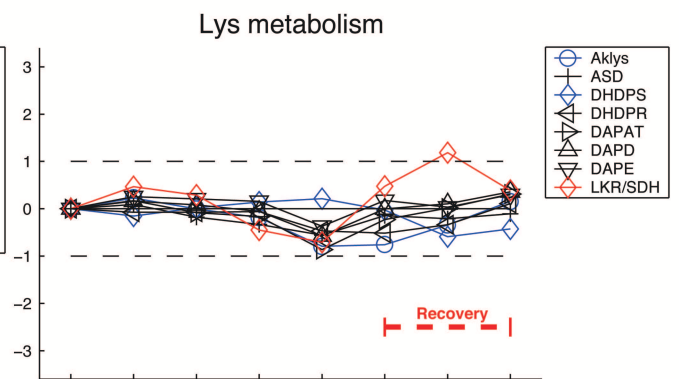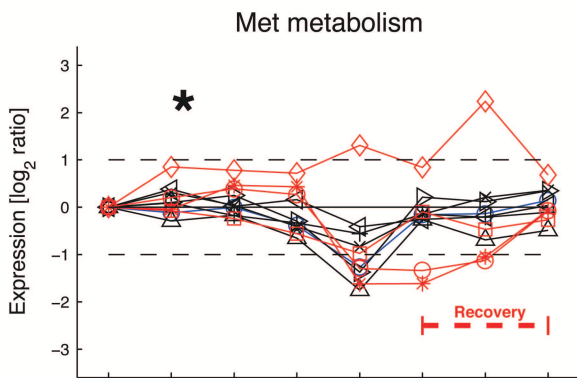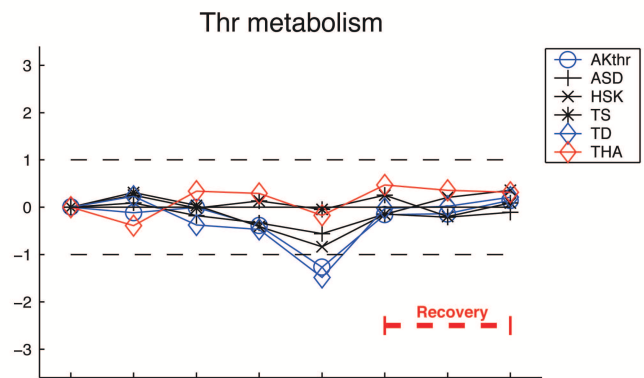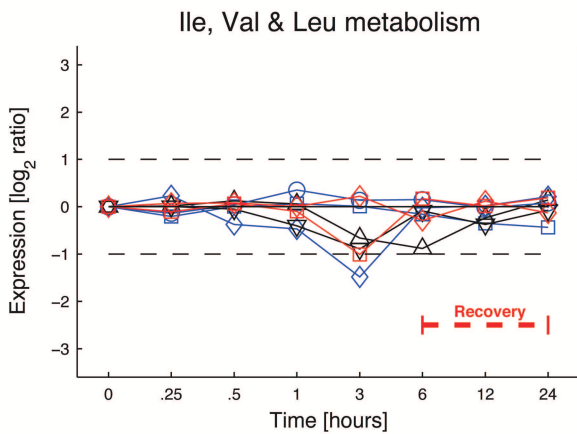

# Drought Stress (Root)

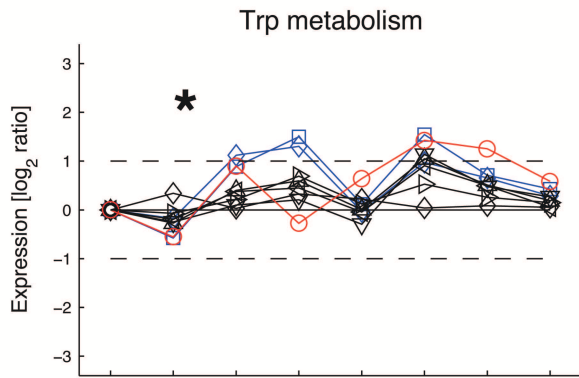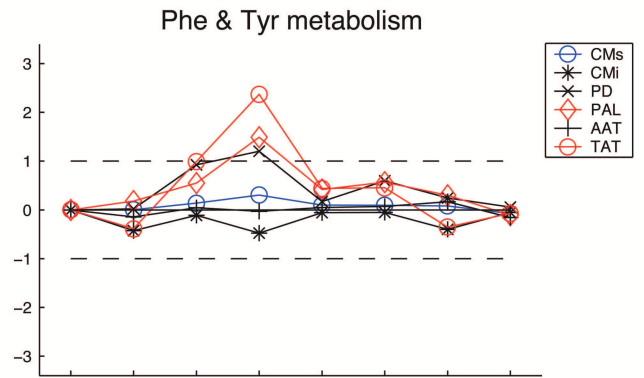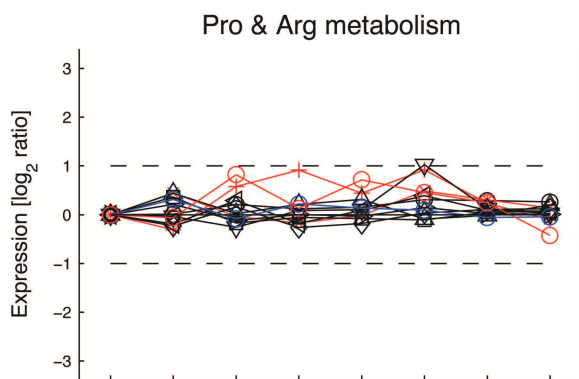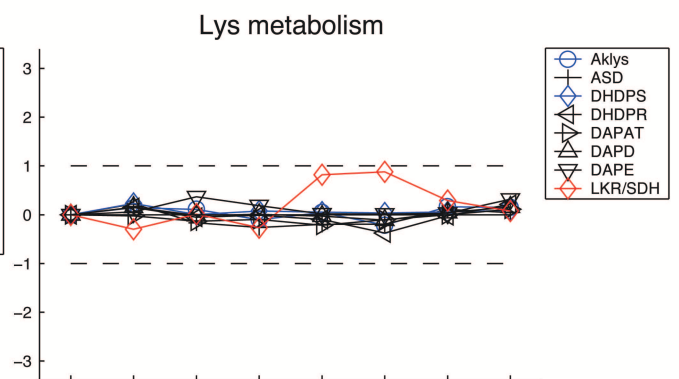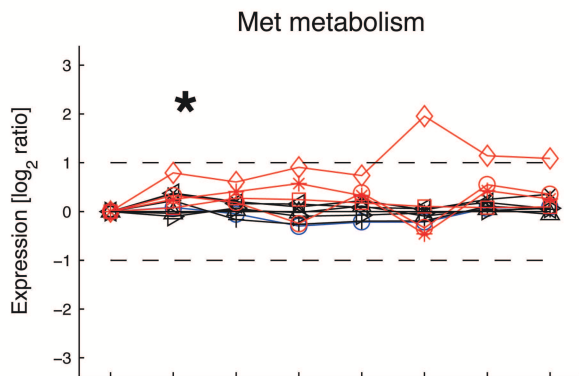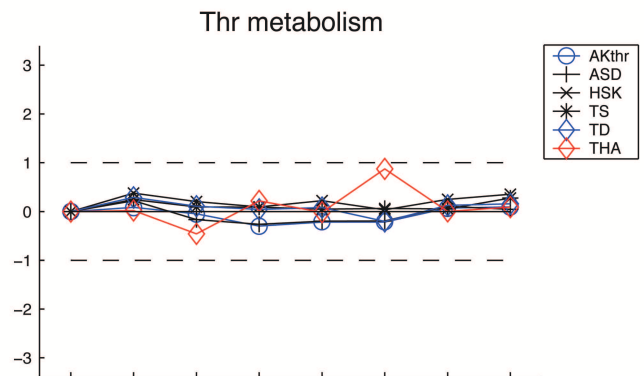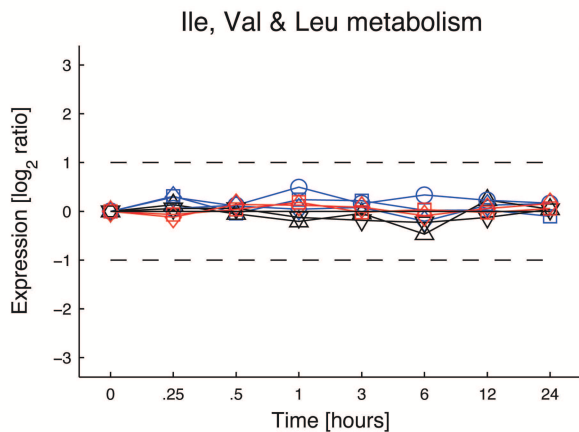

0 .25 .5 1 3 6 12 24

Time [hours]

# Cold Stress (Root)

## Trp metabolism

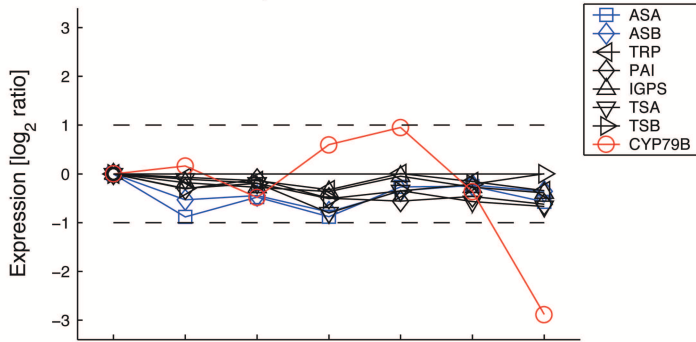

## Phe & Tyr metabolism

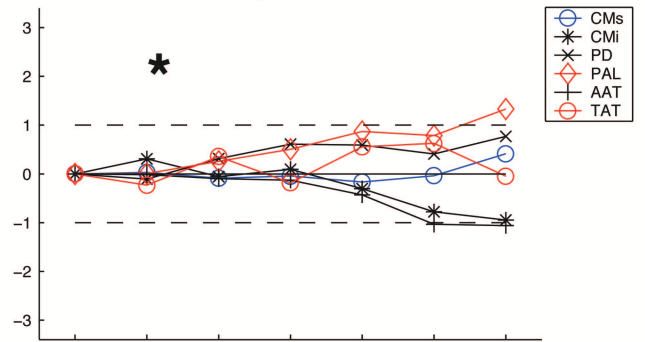

## Pro & Arg metabolism

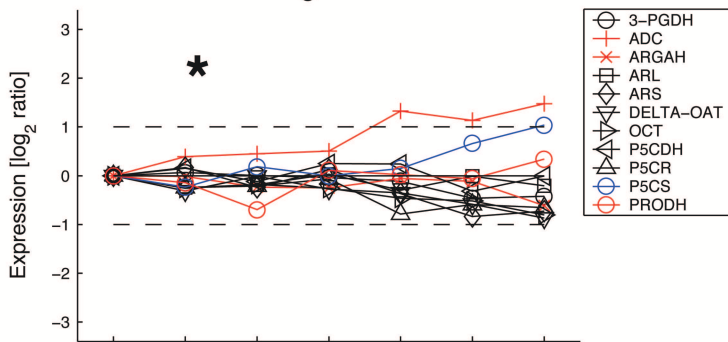

## Lys metabolism

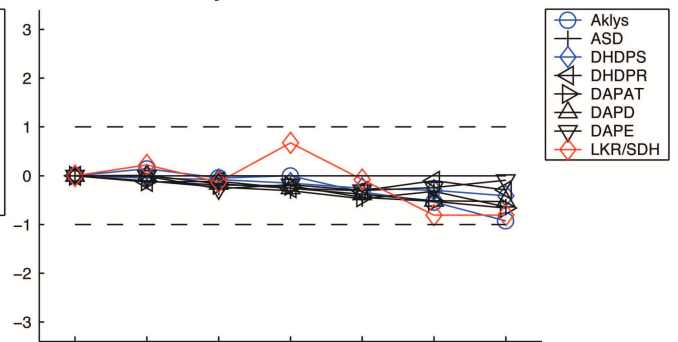

## Met metabolism

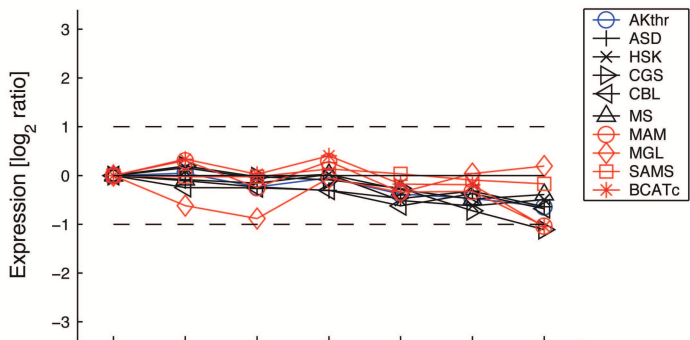

## Thr metabolism

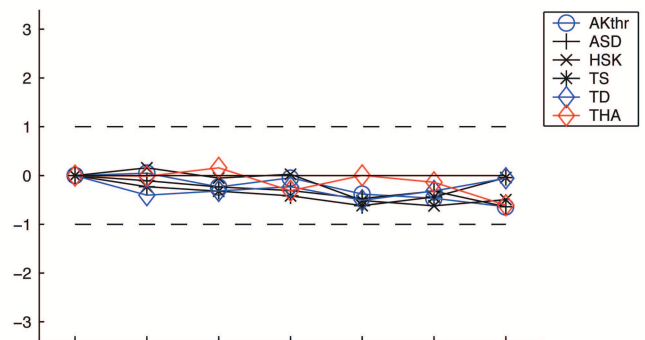

## Ile, Val & Leu metabolism

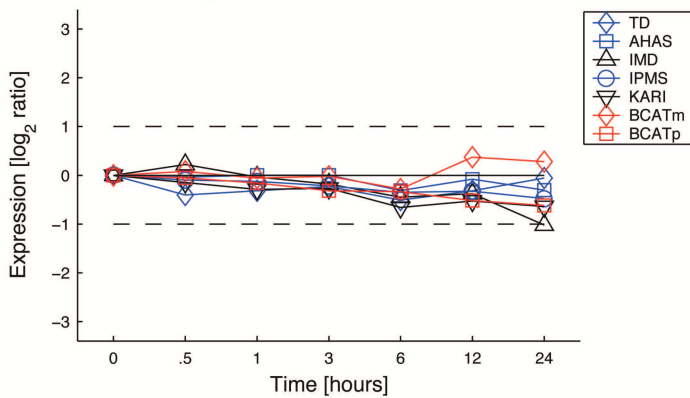

Time [hours]

Time [hours]

# Wounding Stress (Root)

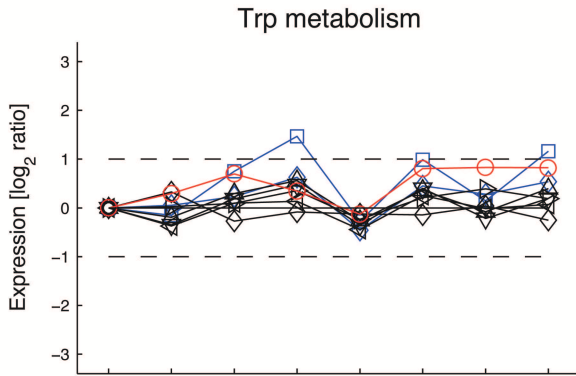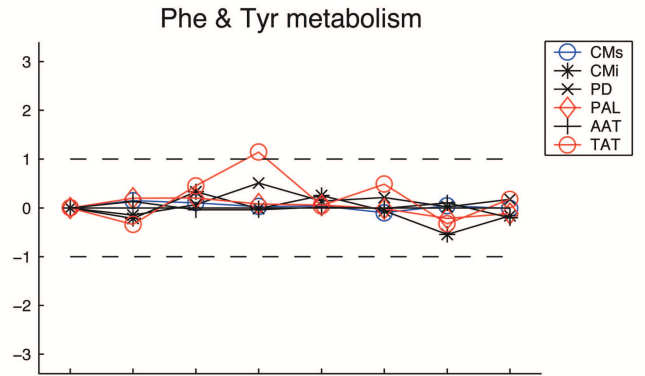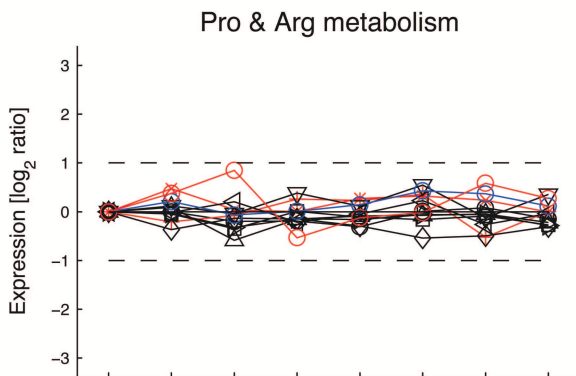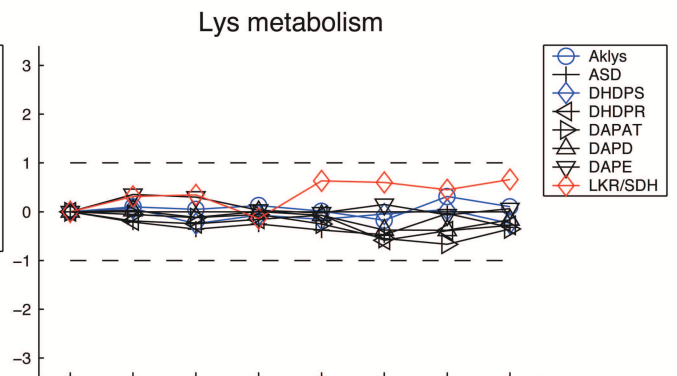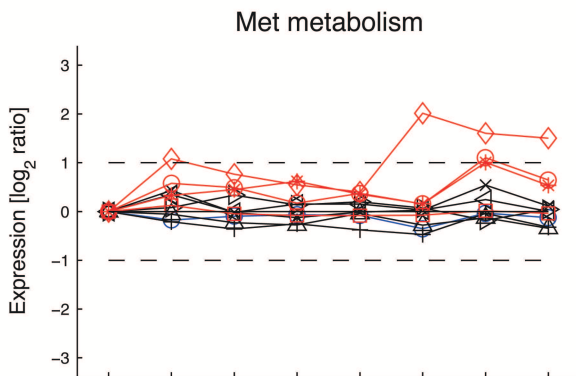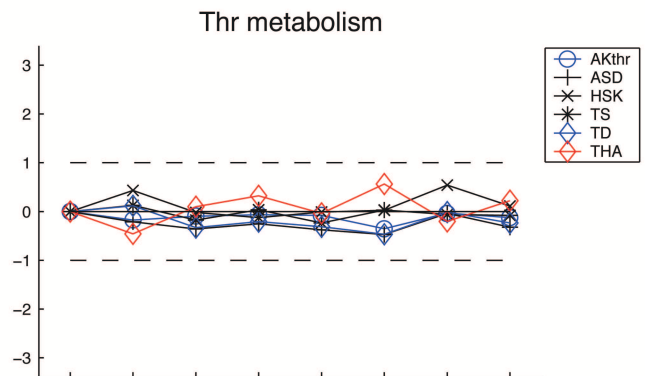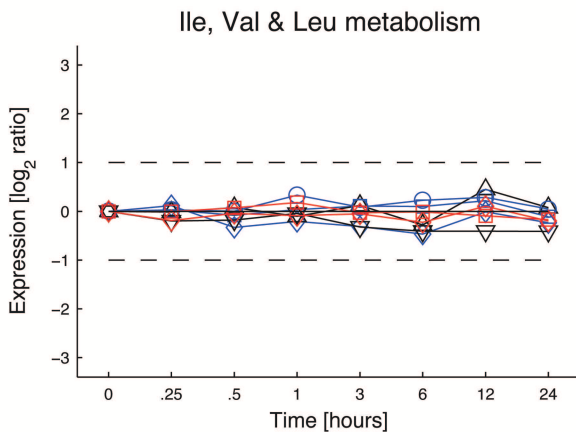

Supplement: plntphys_pp.108.115733_6.pdf [file plntphys_pp.108.115733_6.pdf]
