# Supplementary material
Source: PubMed Central journal article supplement (PMC2330312)
Supplement: plntphys_pp.108.115733_5.pdf [file plntphys_pp.108.115733_5.pdf]

# UV-B Stress (Shoot)

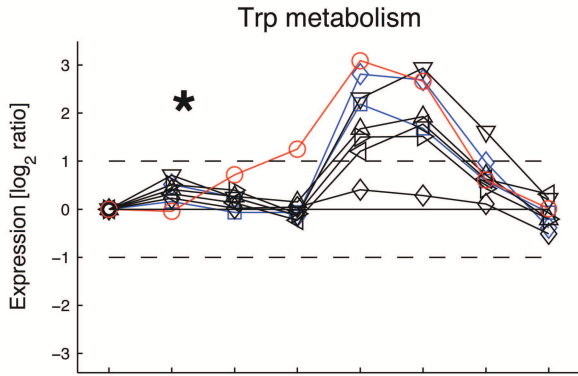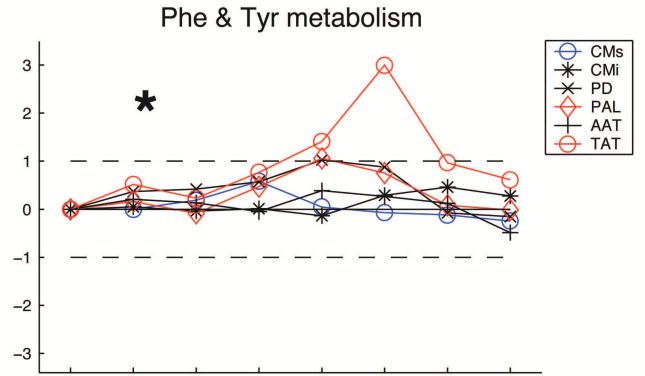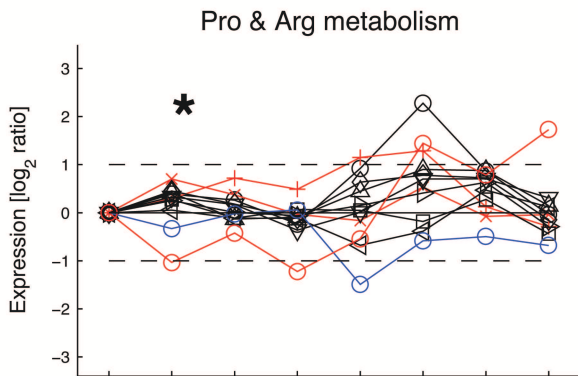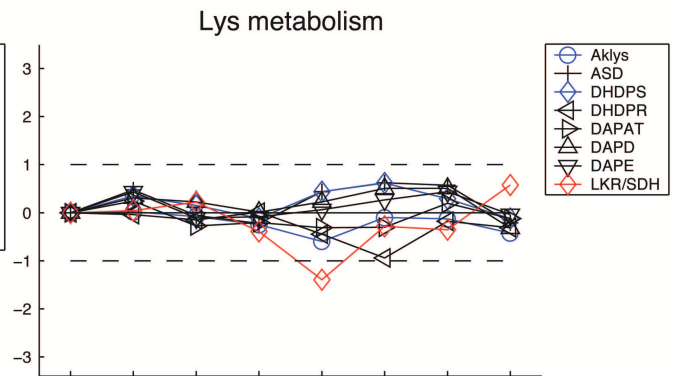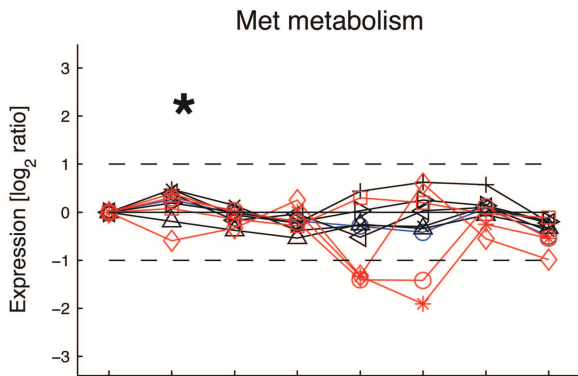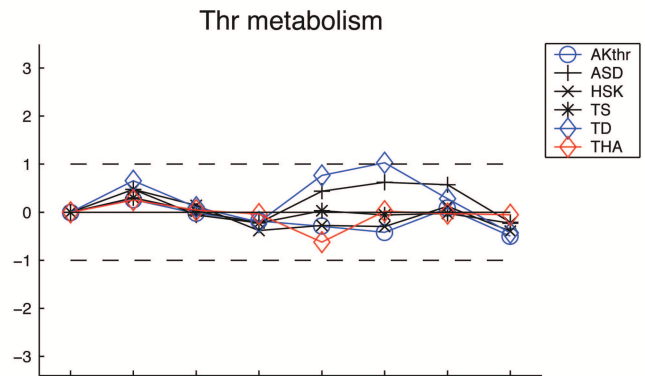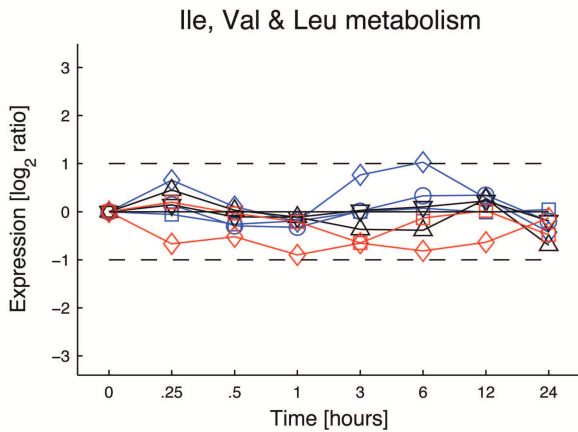

# Salt Stress (Shoot)

## Trp metabolism

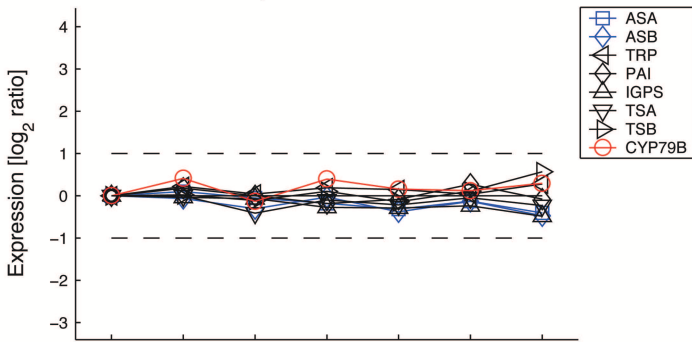

## Phe & Tyr metabolism

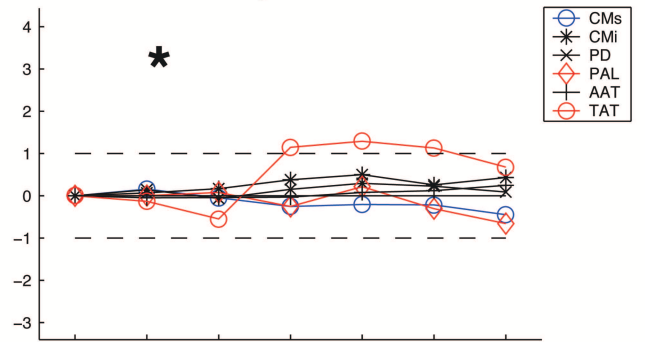

## Pro & Arg metabolism

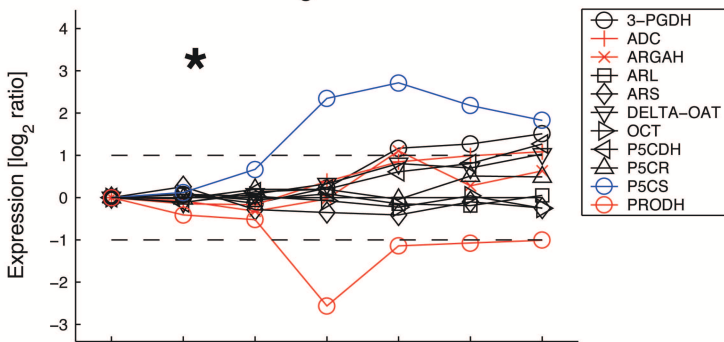

## Lys metabolism

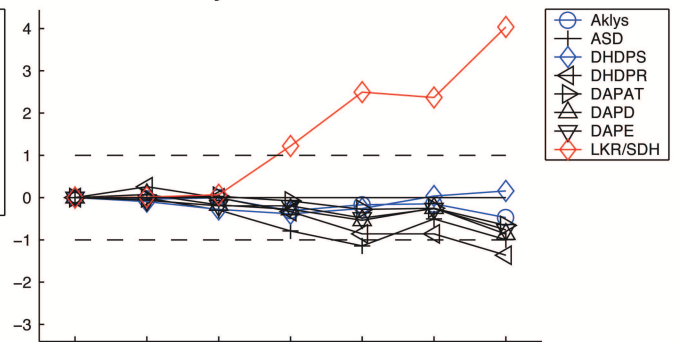

## Met metabolism

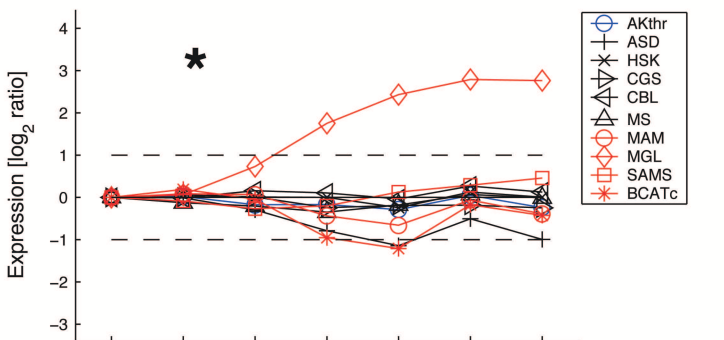

## Thr metabolism

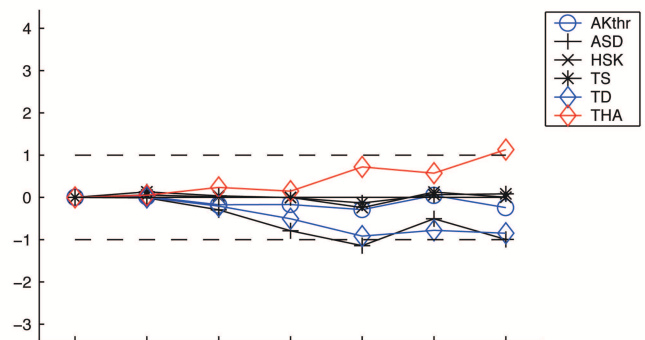

## Ile, Val & Leu metabolism

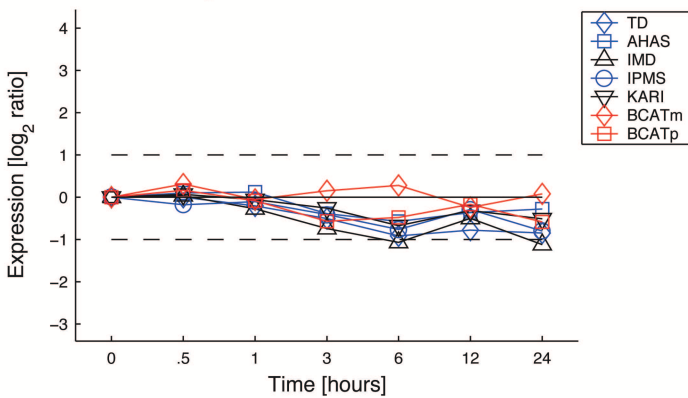

# Oxidative Stress (Shoot)

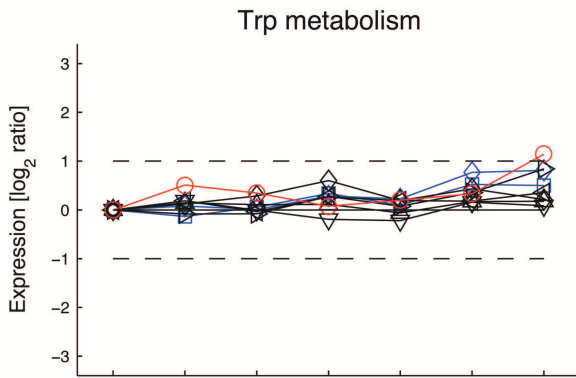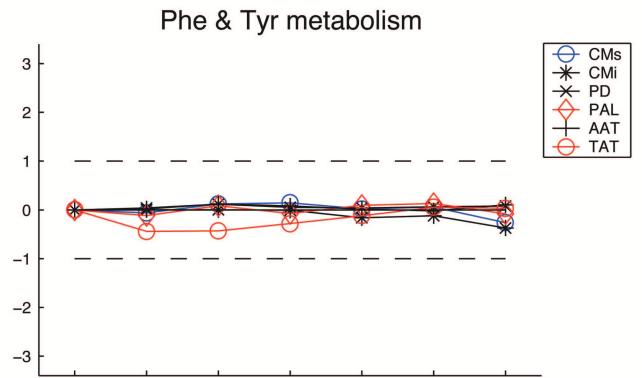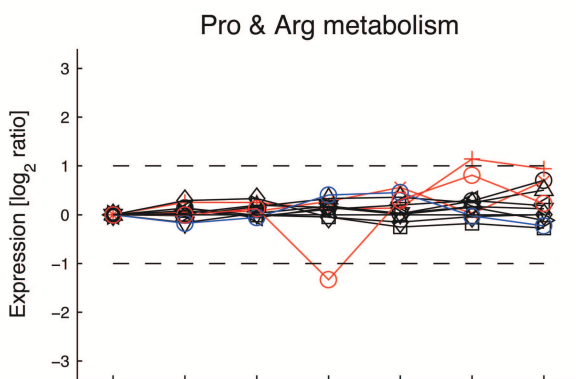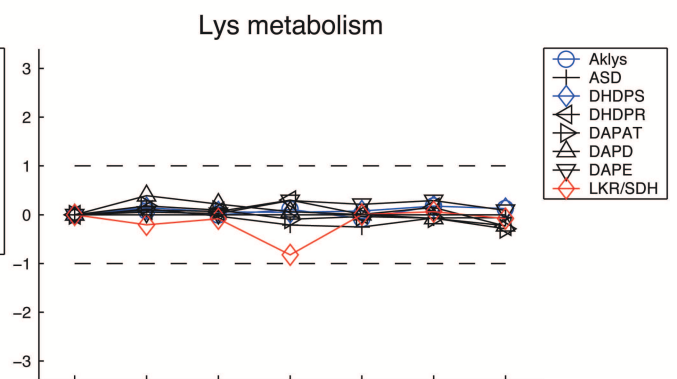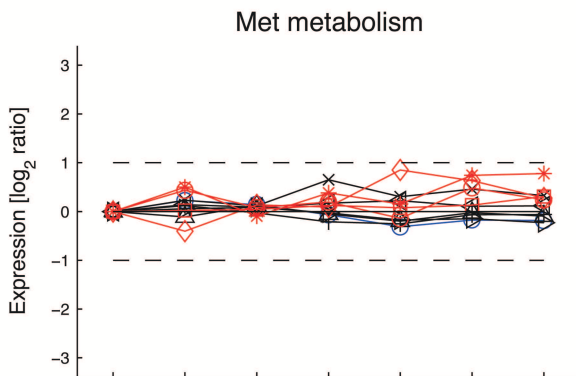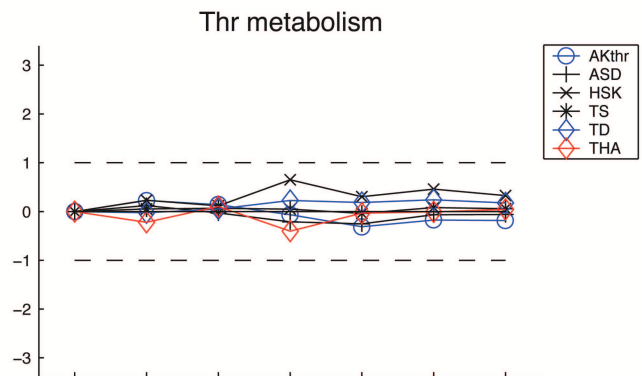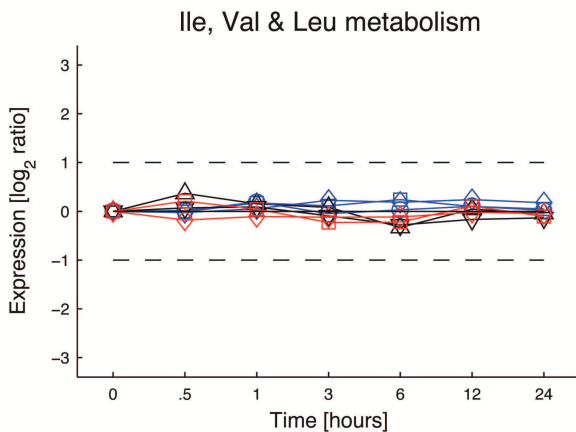

# Osmotic Stress (Shoot)

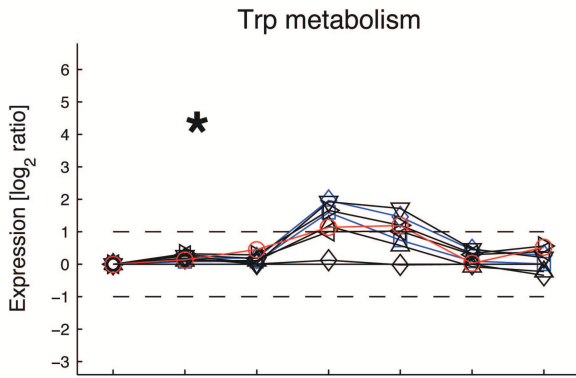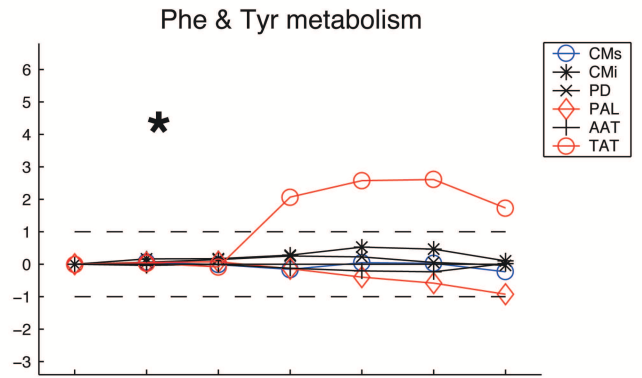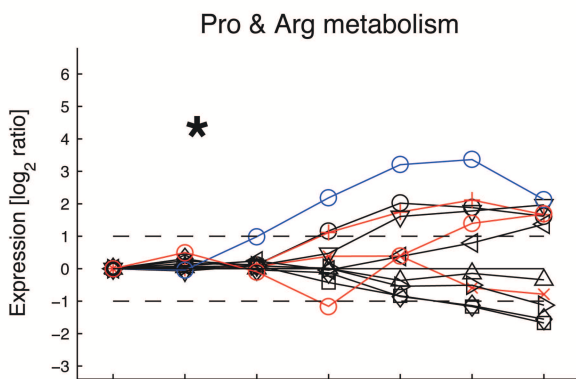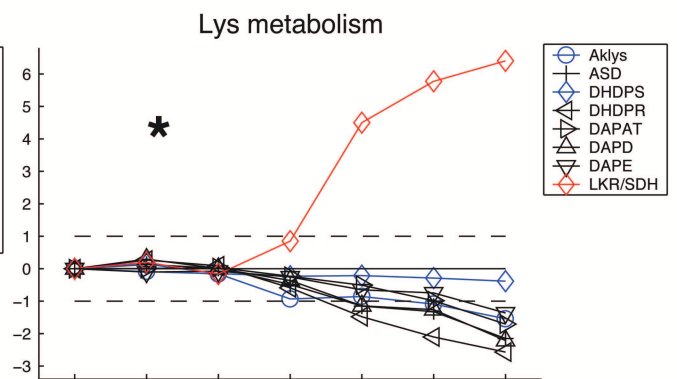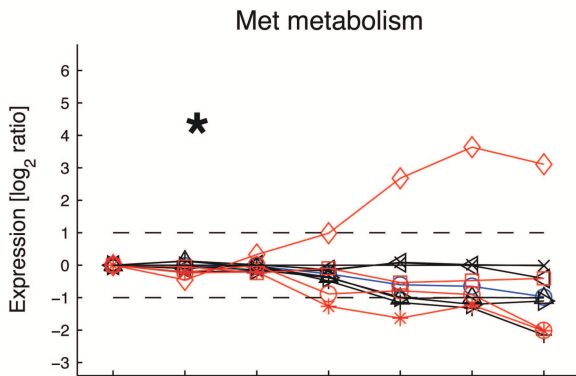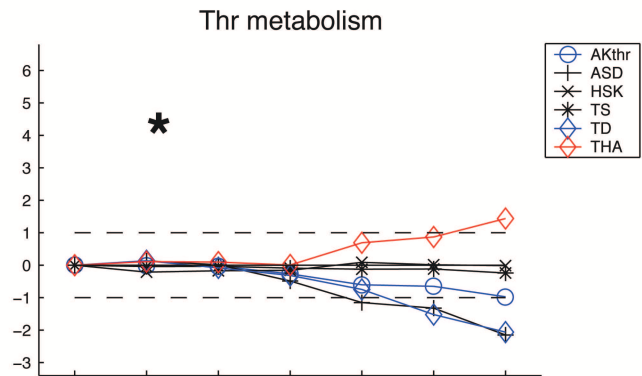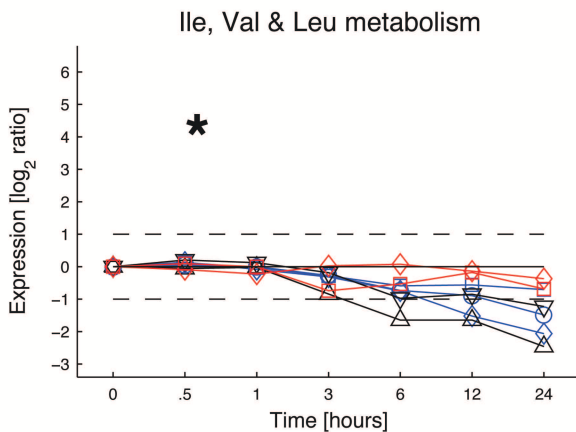

# Heat Stress (Shoot)

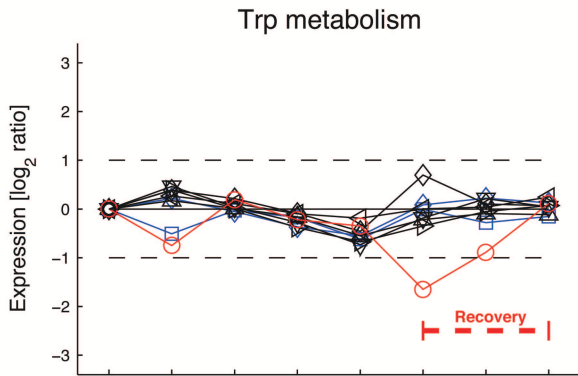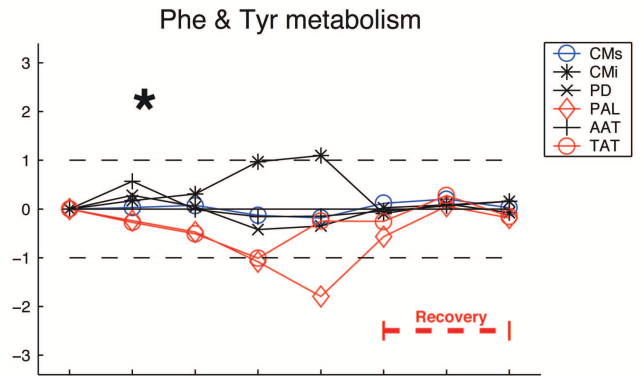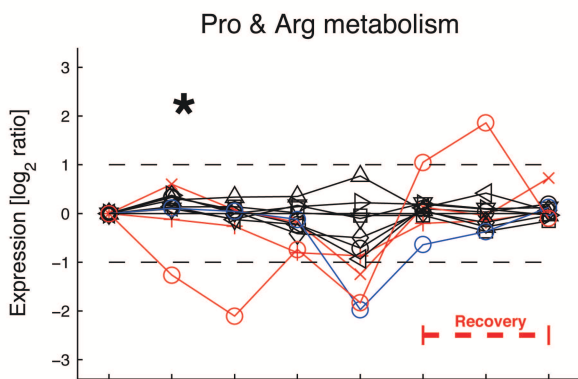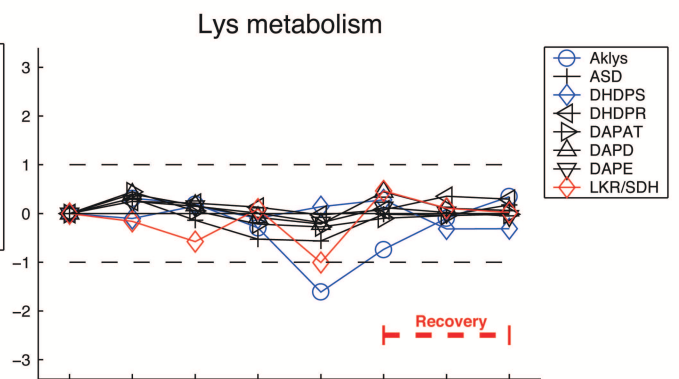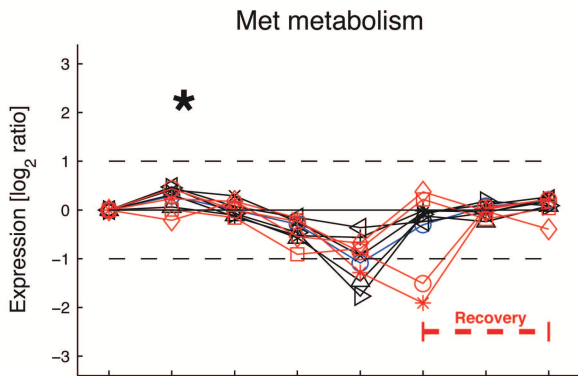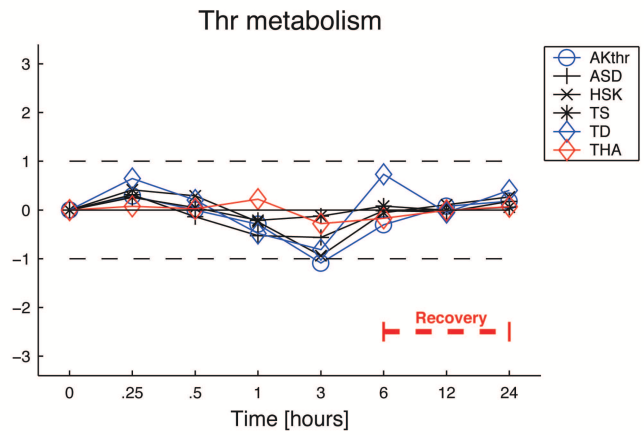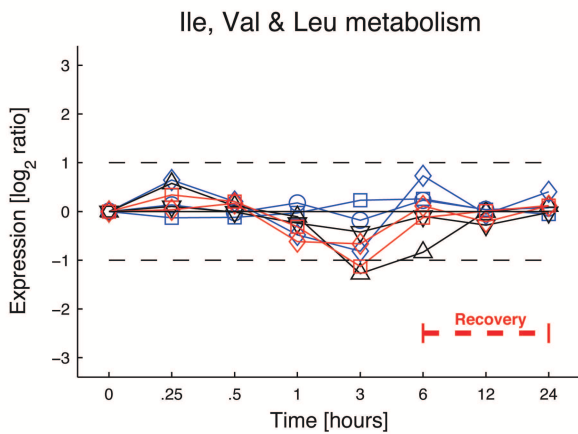

# Drought Stress (Shoot)

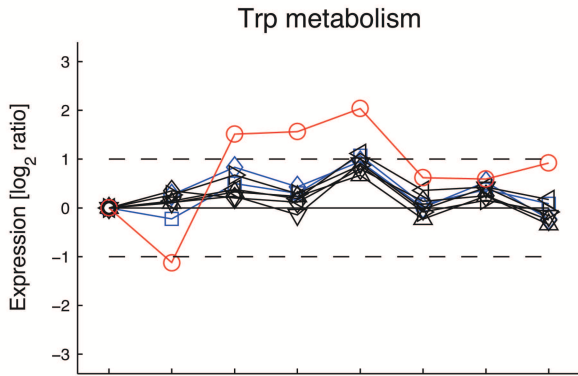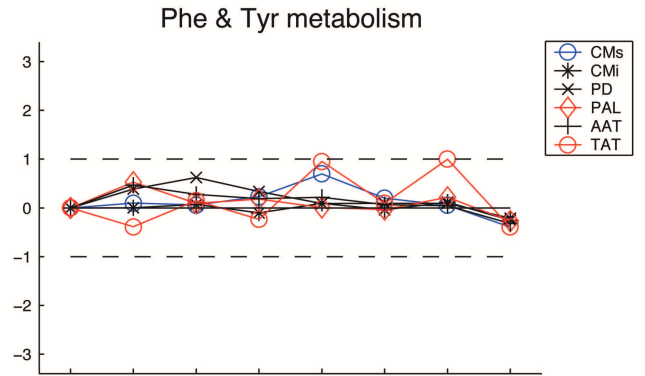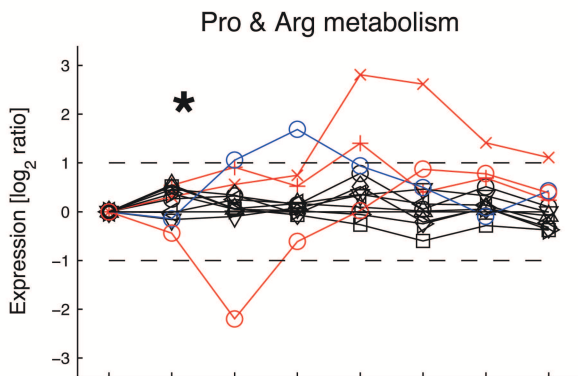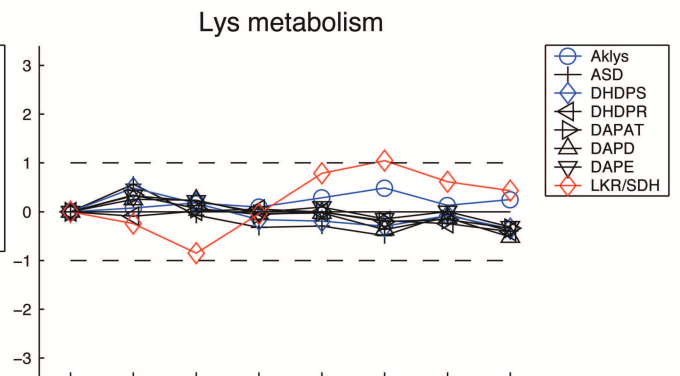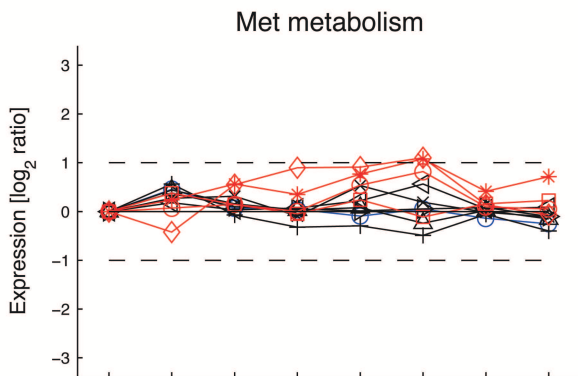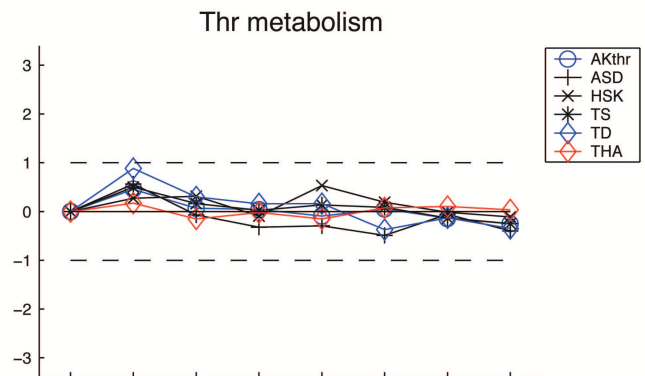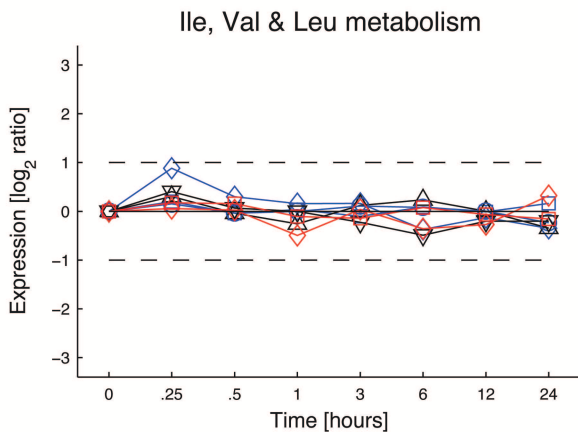

Time [hours]

# Cold Stress (Shoot)

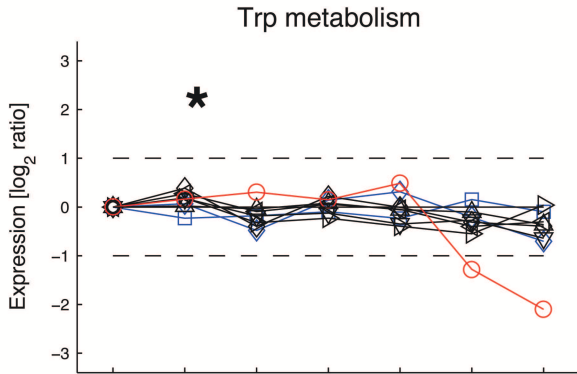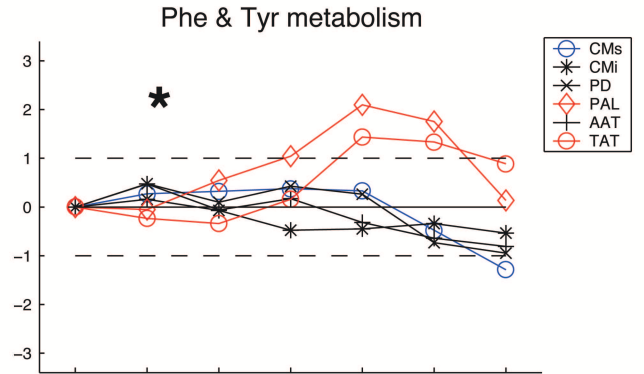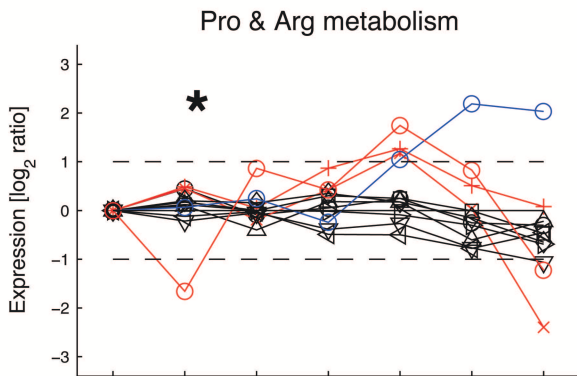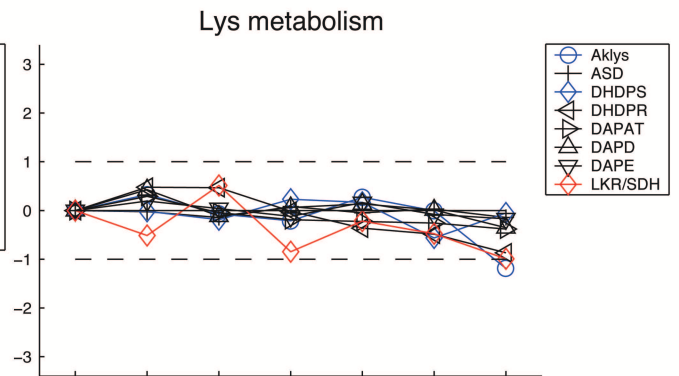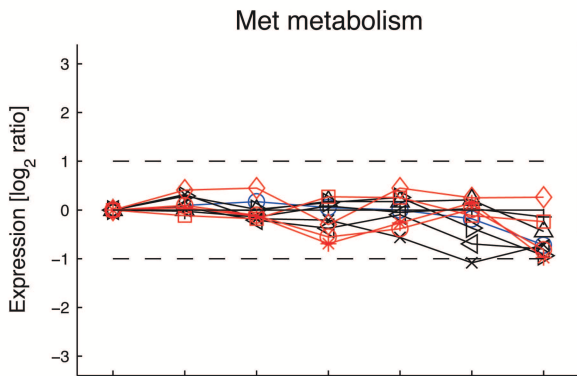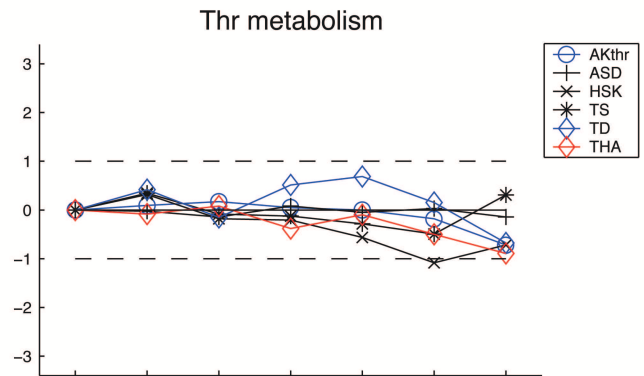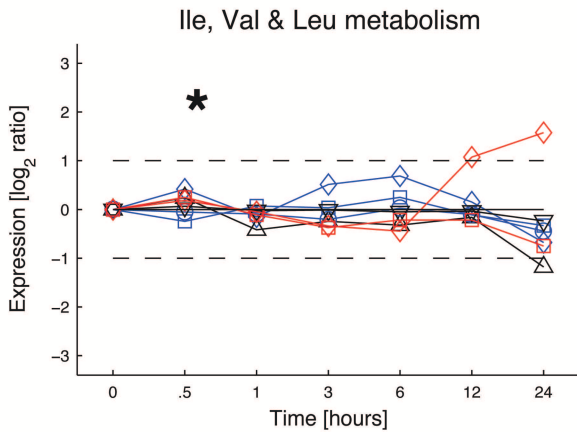

# Wounding Stress (Shoot)

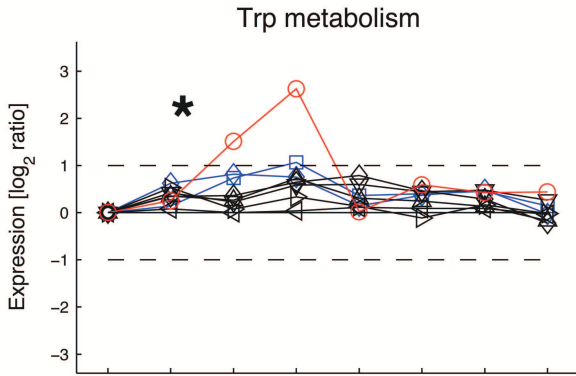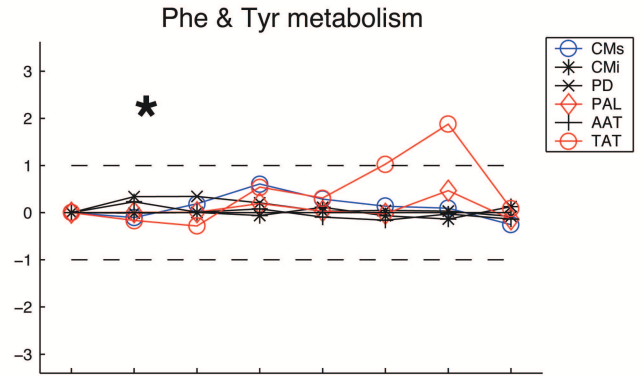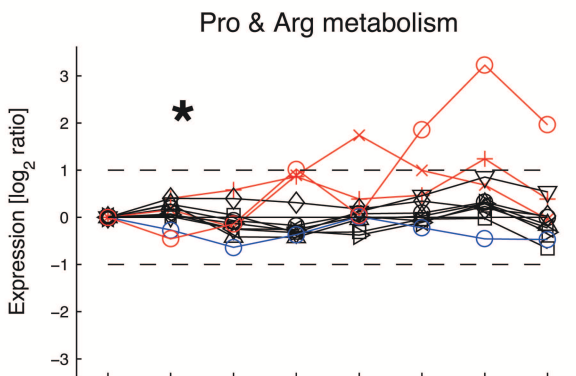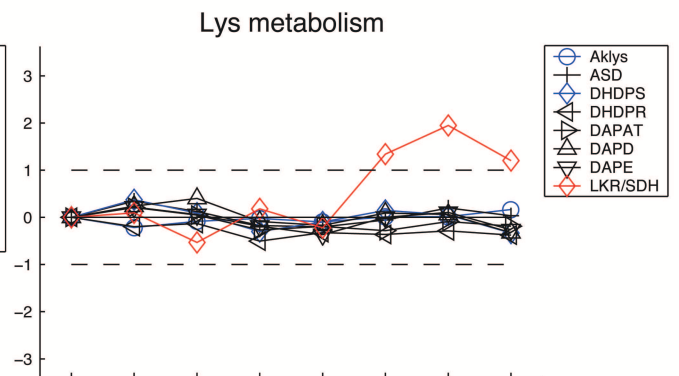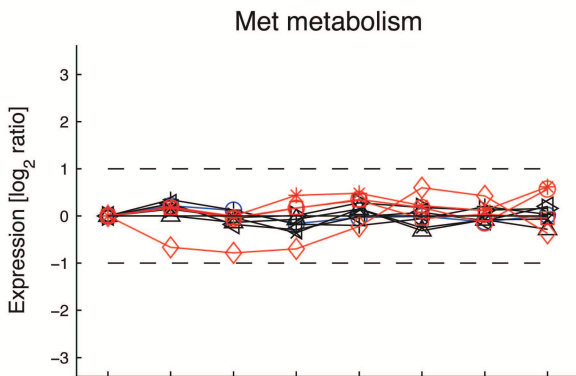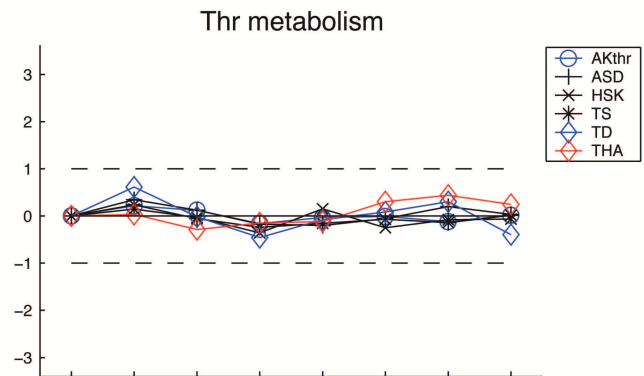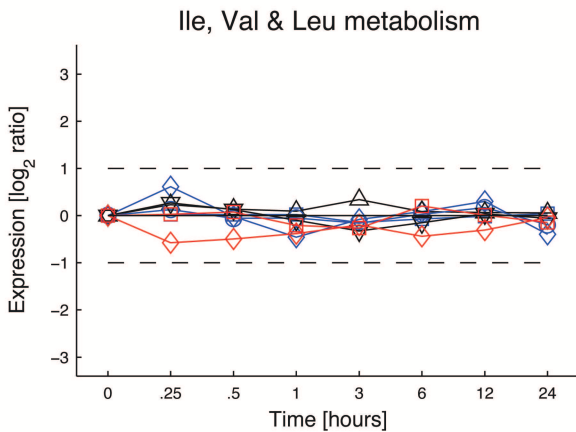

Time [hours]
