# Supplementary material
Source: PubMed Central journal article supplement (PMC2330312)

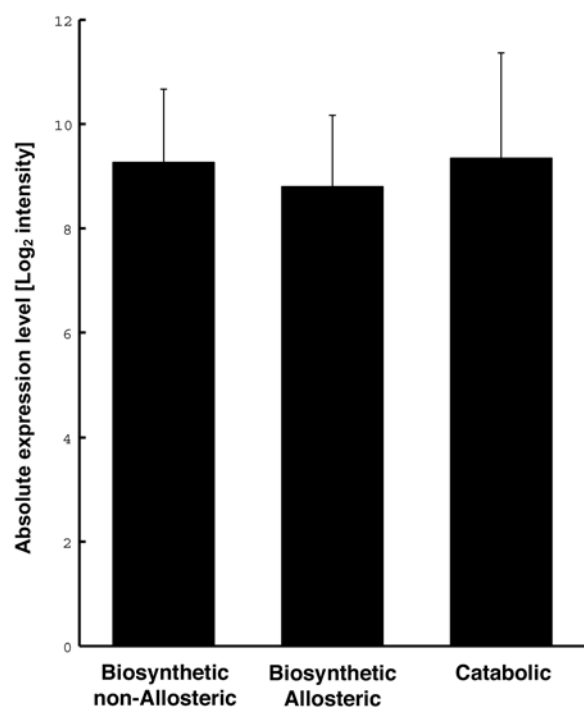

Supplement: plntphys_pp.108.115733_1.pdf [file plntphys_pp.108.115733_1.pdf]

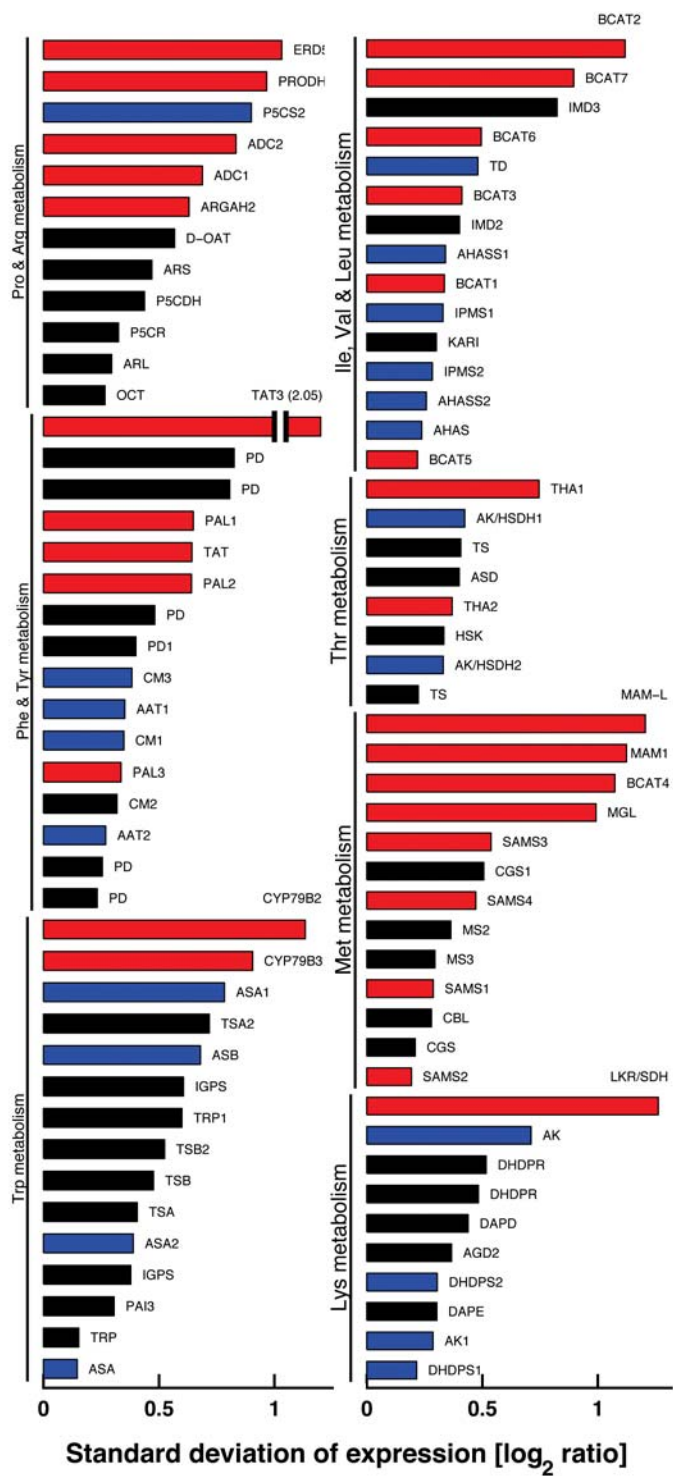

Supplement: plntphys_pp.108.115733_2.pdf [file plntphys_pp.108.115733_2.pdf]

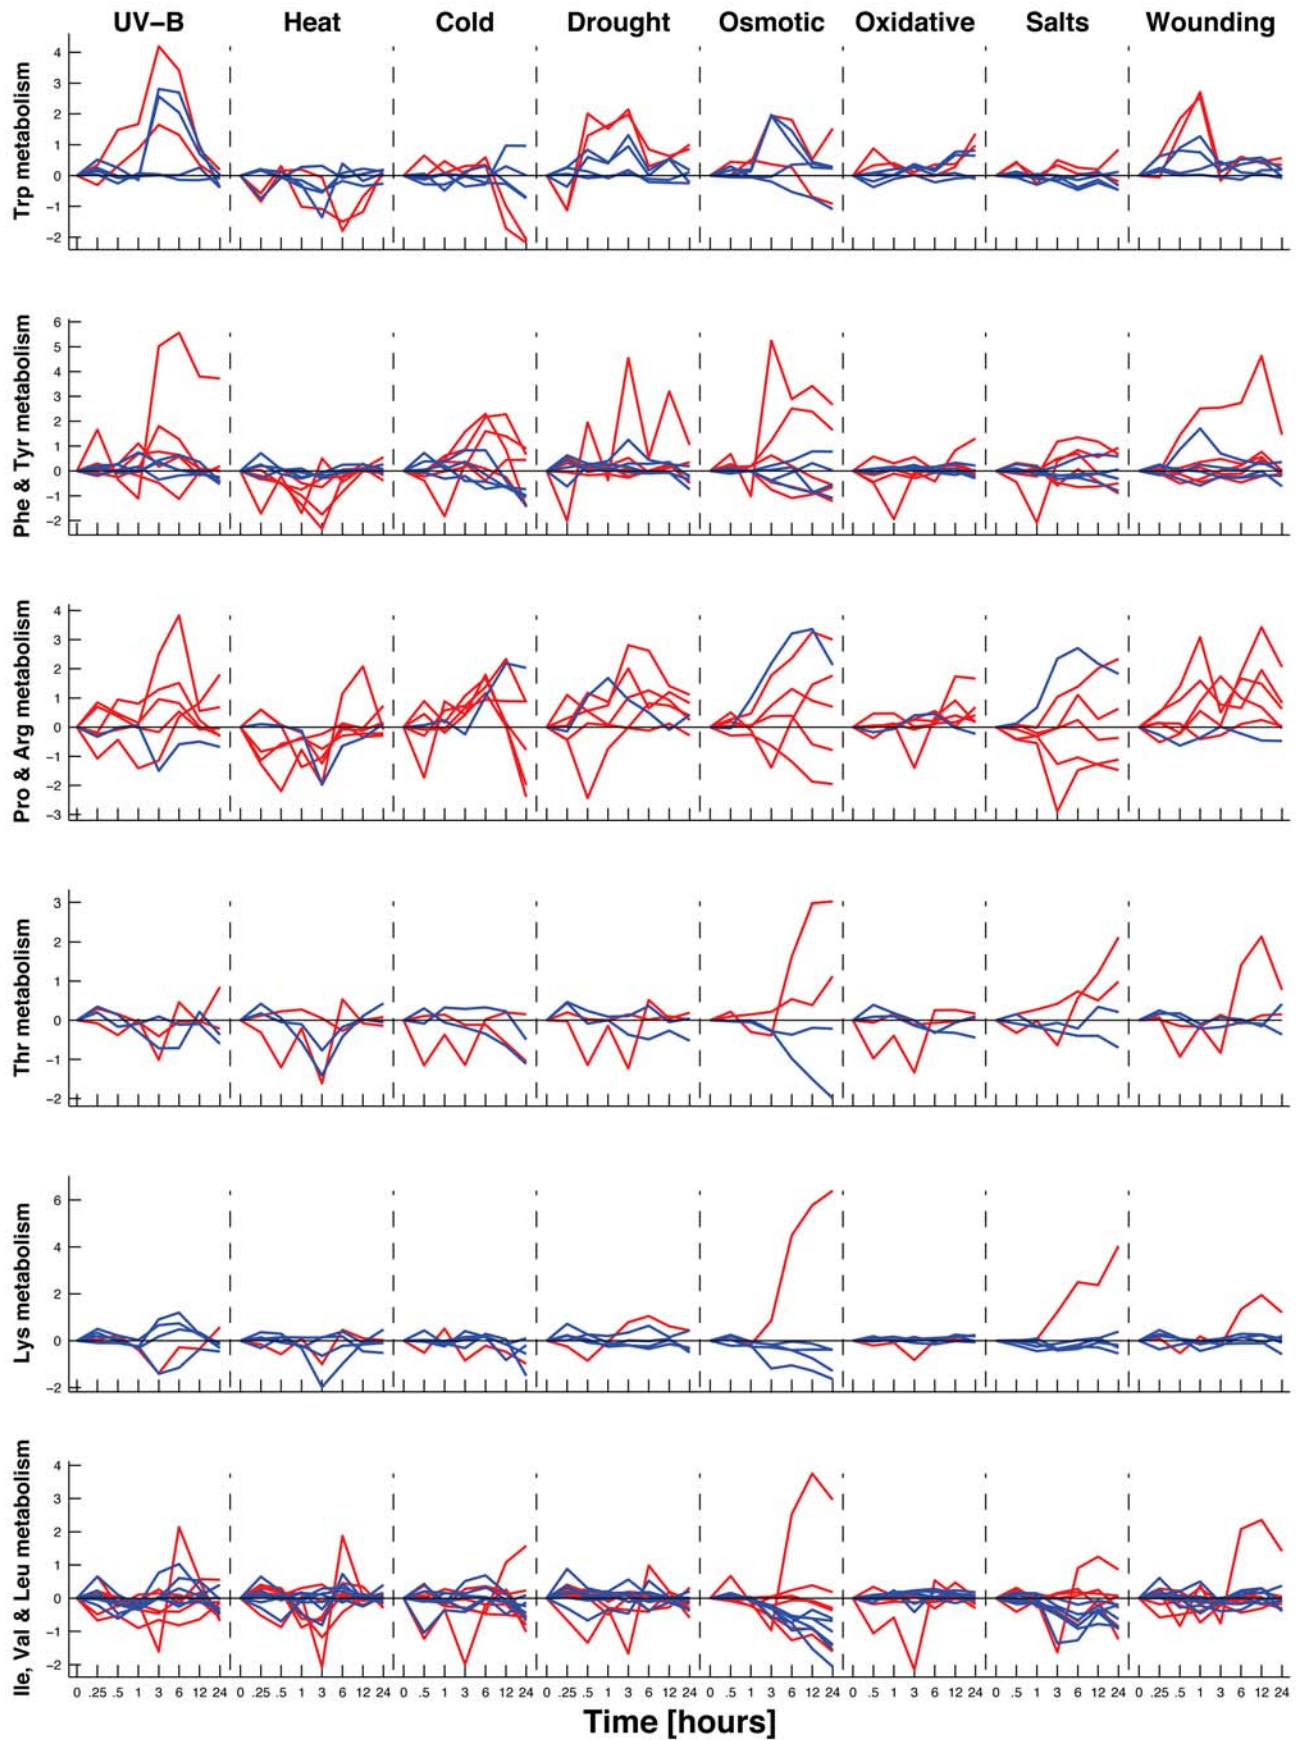

Supplement: plntphys_pp.108.115733_3.pdf [file plntphys_pp.108.115733_3.pdf]

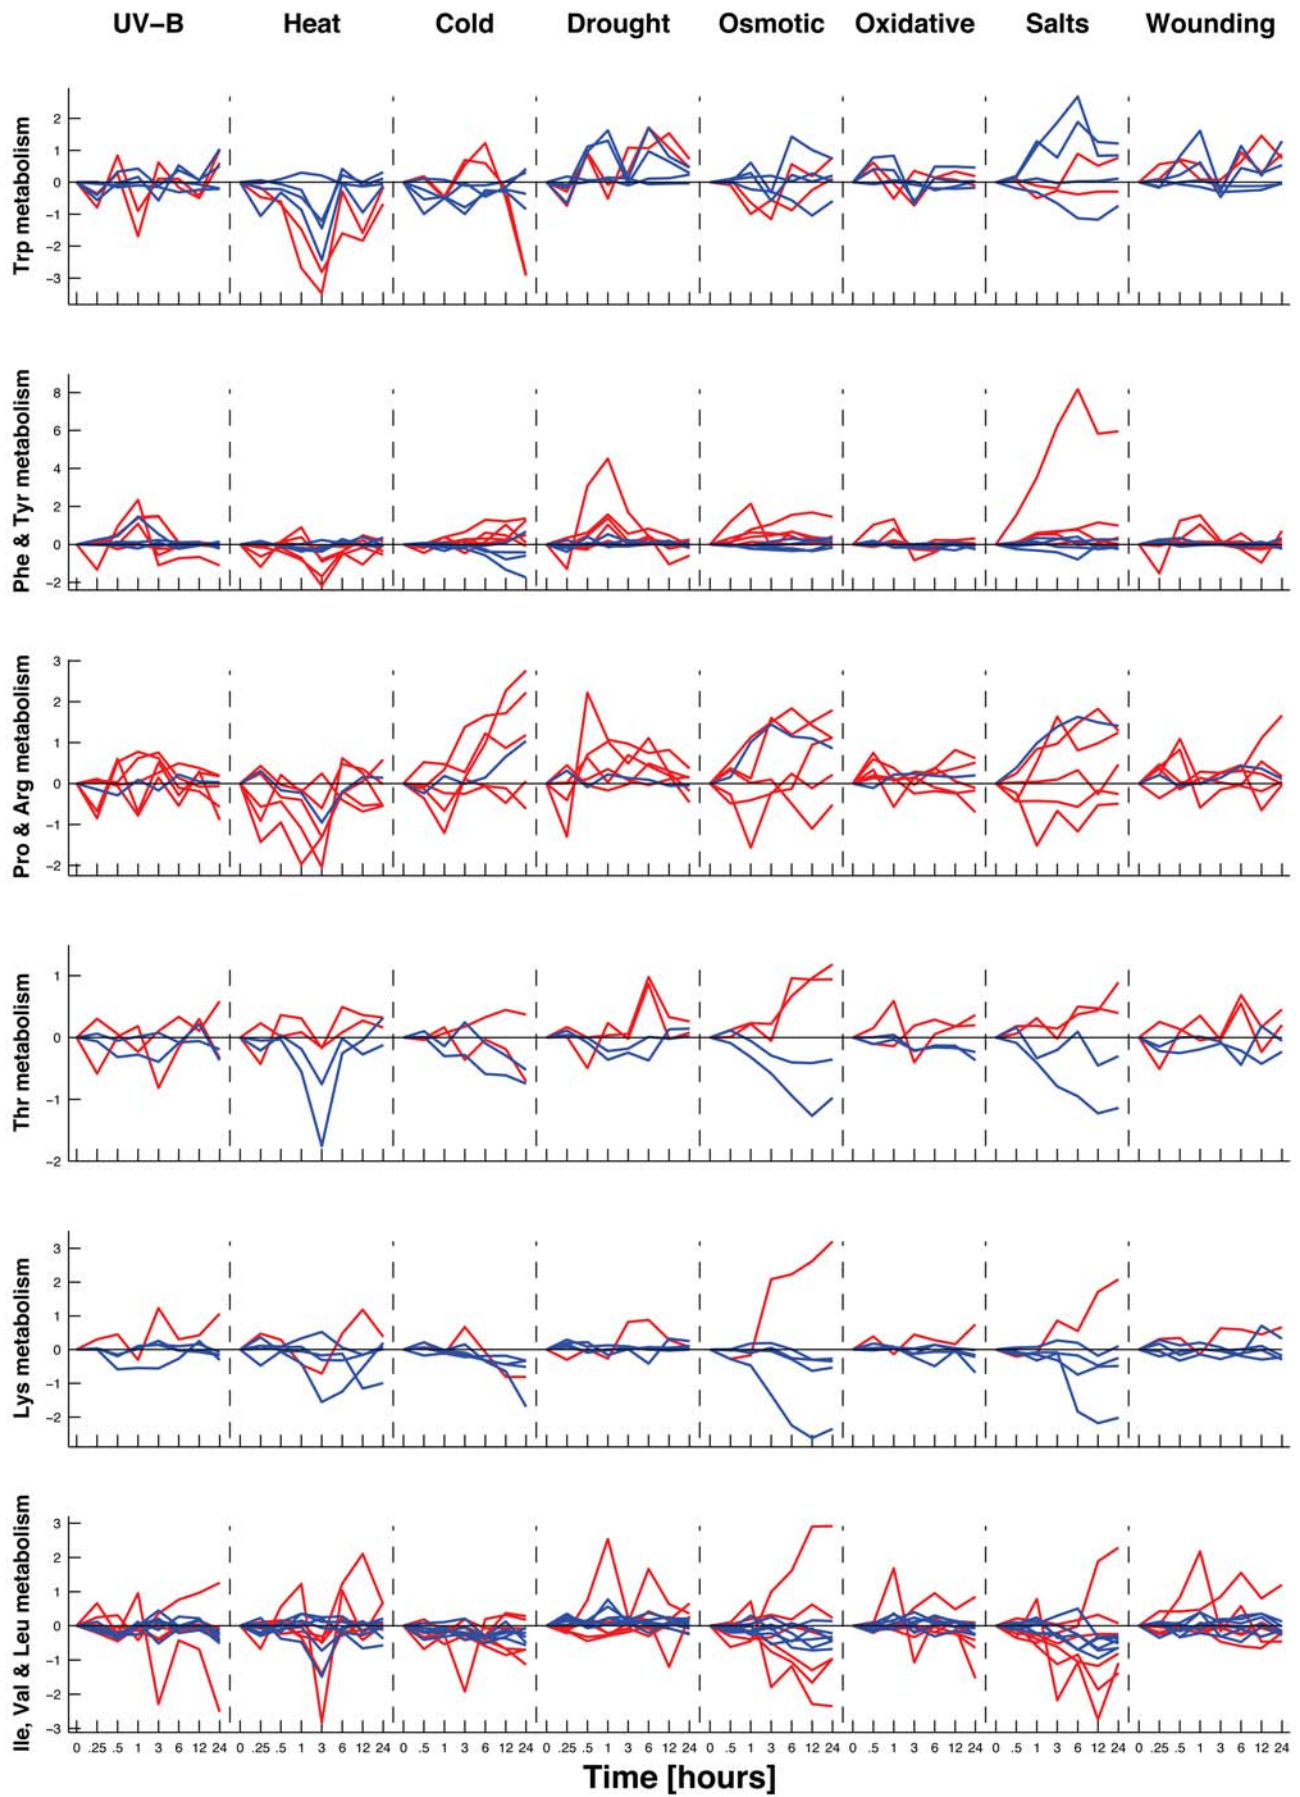

Supplement: plntphys_pp.108.115733_4.pdf [file plntphys_pp.108.115733_4.pdf]

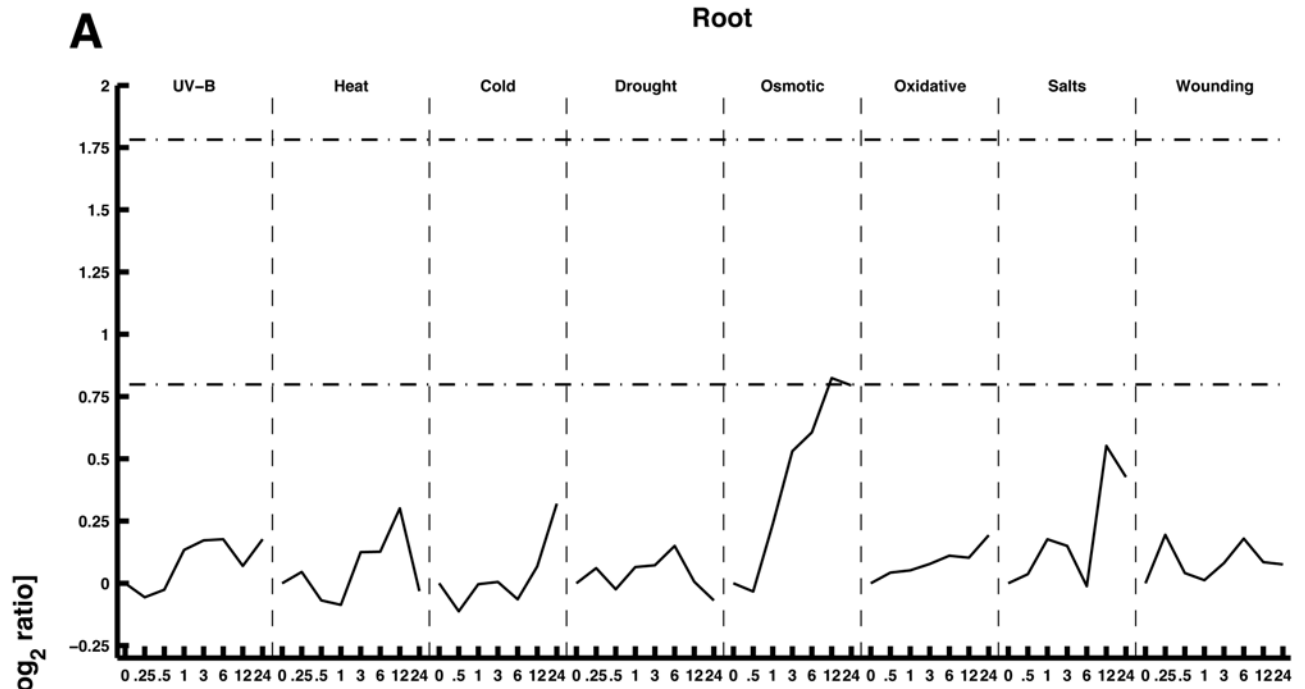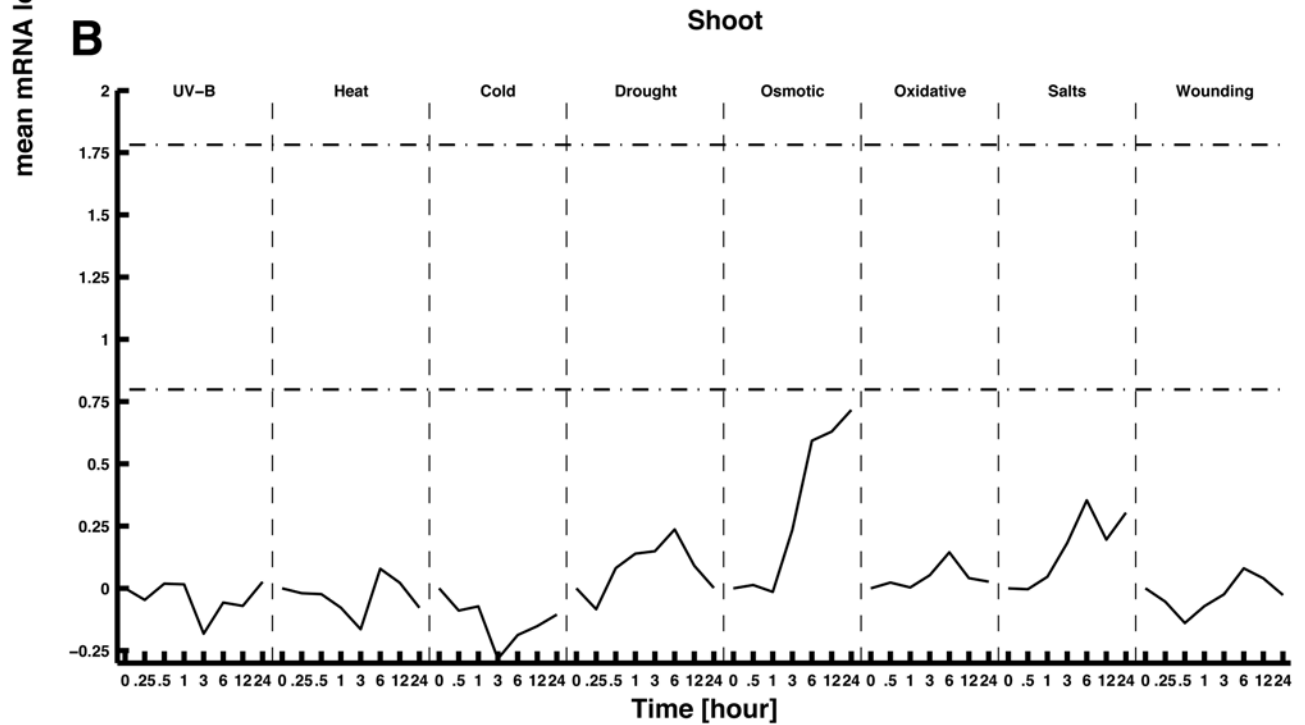

Supplement: plntphys_pp.108.115733_7.pdf [file plntphys_pp.108.115733_7.pdf]
